# 1 Large-scale geographic survey provides insights into the colonization history of a major 2 aphid pest on its cultivated apple host in Europe, North America and North Africa

3  
4 Olvera-Vazquez S.G.<sup>1</sup>, Remoué C.<sup>1</sup>, Venon A.<sup>1</sup>, Rousselet A.<sup>1</sup>, Grandcolas O.<sup>1</sup>, Azrine M.<sup>1</sup>,  
5 Momont L.<sup>1</sup>, Galan M.<sup>2</sup>, L. Benoit<sup>2</sup>, David G.<sup>3</sup>, Alhmedi A.<sup>4</sup>, Beliën T.<sup>4</sup>, Alins G.<sup>5</sup>, Franck  
6 P.<sup>6</sup>, Haddioui A.<sup>7</sup>, Jacobsen S.K.<sup>8</sup>, Andreev R.<sup>9</sup>, Simon S.<sup>10</sup>, Sigsgaard L.<sup>8</sup>, Guibert E.<sup>11</sup>,  
7 Tournant L.<sup>12</sup>, Gazel F.<sup>13</sup>, Mody K.<sup>14</sup>, Khachtib Y.<sup>7</sup>, Roman A.<sup>15</sup>, Ursu T.M.<sup>15</sup>, Zakharov I.A.  
8 <sup>16</sup>, Belcram H.<sup>1</sup>, Harry M.<sup>17</sup>, Roth M.<sup>18</sup>, Simon J.C.<sup>19</sup>, Oram S.<sup>20</sup>, Ricard J.M.<sup>11</sup>, Agnello A.<sup>21</sup>,  
9 Beers E. H.<sup>22</sup>, Engelman J.<sup>23</sup>, Balti I.<sup>24</sup>, Salhi-Hannachi A.<sup>24</sup>, Zhang H.<sup>25</sup>, Tu H.<sup>25</sup>, Mottet C.<sup>26</sup>,  
10 Barrès B.<sup>26</sup>, Degrave A.<sup>27</sup>, Razmjou J.<sup>28</sup>, Giraud T.<sup>3</sup>, Falque M.<sup>1</sup>, Dapena E.<sup>29</sup>, Miñarro, M.<sup>29</sup>,  
11 Jardillier L.<sup>3</sup>, Deschamps P.<sup>3</sup>, Jousselin E.<sup>2</sup>, Cornille, A.<sup>1</sup>

12  
13 1. Université Paris Saclay, INRAE, CNRS, AgroParisTech, GQE - Le Moulon, 91190  
14 Gif-sur-Yvette, France

15 2. INRAE, UMR 1062, Centre de Biologie pour la Gestion des Populations CBGP  
16 (INRAE, IRD, CIRAD, Montpellier SupAgro), Montferrier-sur-Lez, 34980, France.

17 3. Ecologie Systematique et Evolution, CNRS, AgroParisTech, Université Paris-Saclay,  
18 91400, Orsay, France

19 4. Department of Zoology, Fruit Research Center (pcfruit *npo*), Sint-Truiden, Belgium.

20 5. Institut de Recerca i Tecnologia Agroalimentàries, IRTA-Fruit Production, PCiTAL, Parc  
21 de Gardeny, edifici Fruitcentre, 25003 Lleida, Spain

22 6. INRAE, UR1115, Plantes et Système de cultures Horticoles (PSH), Agroparc CS 40509,  
23 Avignon, F-84000, France.

24 7. Laboratory of Biotechnology and Valorisation of Plant Genetic Resources, Faculty of  
25 Sciences and Techniques, University of Sultan Moulay Slimane, Beni Mellal, Morocco

- 26 8. Department of Plant and Environmental Sciences, University of Copenhagen, Denmark.
- 27 9. Department of Entomology, Agricultural University, Plovdiv, Bulgaria.
- 28 10. Unité Expérimentale UERI 695, INRAE, 460 Chemin de Gotheron, F-26320 Saint-
- 29 Marcel-lès-Valence, France
- 30 11. CTIFL, Centre opérationnel de Balandran
- 31 12. Fédération Régionale de Défense contre les Organismes Nuisibles Nord Pas-de-Calais,
- 32 Loos-en-Gohelle, France
- 33 13. BORDX ARBORI UE - Unité d'arboriculture
- 34 14. Department of Applied Ecology, Hochschule Geisenheim University, Geisenheim,
- 35 Germany
- 36 15. Institute of Biological Research Cluj, Branch of National Institute of Research and
- 37 Development for Biological Sciences (NIRDBS), 400015, Cluj-Napoca, Romania.
- 38 16. Vavilov Institute of General Genetics RAS, Moscow, Russia
- 39 17. Laboratoire Évolution, Génomes, Comportement, Écologie, UMR9191
- 40 CNRS/IRD/Université Paris-Saclay, Gif-sur-Yvette, France
- 41 18. GAFL, INRAE, 84140, Montfavet, France
- 42 19. INRAE, UMR IGEPP, Domaine de la Motte, Le Rheu, France
- 43 20. People's Trust for Endangered Species, London, UK
- 44 21. Department of Entomology, Cornell AgriTech, Cornell University, Geneva, NY
- 45 22. Department of Entomology, Tree Fruit Research and Extension Center, Washington State
- 46 University, Wenatchee, WA
- 47 23. Virginia Tech, Alson H. Smith, Jr. Agricultural Research and Extension Center, 595
- 48 Laurel Grove Road, Winchester, VA 22602, USA

49 24. Department of Biology, Faculty of Science of Tunis, University of Tunis El Manar, 2092,  
50 Tunis, Tunisia, Salhi-Hannachi A: Department of Biology, Faculty of Science of Tunis,  
51 University of Tunis, Tunisia.

52 25. Zhengzhou Fruit Research Institute, Chinese Academy of Agricultural Sciences, 450009,  
53 Zhengzhou, China.

54 26. Université de Lyon, Anses, INRAE, USC CASPER, 69007 Lyon, France

55 27. IRHS, INRAE, Agrocampus-Ouest, Université d'Angers, SFR 4207 QUASAV,  
56 Beaucozé, France

57 28. Department of Plant Protection, Faculty of Agriculture and natural Resources, University  
58 of Mohaghegh Ardabili, Iran

59 29. Servicio Regional de Investigación y Desarrollo Agroalimentario, Ctra. AS-267, PK 19,  
60 E-33300, Villaviciosa, Asturias, Spain

61

62 Corresponding author: [amandine.cornille@inrae.fr](mailto:amandine.cornille@inrae.fr)

63

64

65

## 66 **Summary**

67 With frequent host shifts involving the colonization of new hosts across large geographical  
 68 ranges, crop pests are good models for examining the mechanisms of rapid colonization. The  
 69 microbial partners of pest insects may be involved or affected by colonization, which has  
 70 been little studied so far. We investigated the demographic history of the rosy apple aphid,  
 71 *Dysaphis plantaginea*, a major pest of the cultivated apple (*Malus domestica*) in Europe,  
 72 North Africa and North America, as well as the diversity of its endosymbiotic bacterial  
 73 community. We genotyped a comprehensive sample of 714 colonies from Europe, Morocco  
 74 and the US using mitochondrial (*CytB* and *COI*), bacterial (16s rRNA and *TrnpB*), and 30  
 75 microsatellite markers. We detected five populations spread across the US, Morocco,  
 76 Western and Eastern Europe, and Spain. Populations showed weak genetic differentiation and  
 77 high genetic diversity, except the Moroccan and the North American that are likely the result  
 78 of recent colonization events. Coalescent-based inferences revealed high levels of gene flow  
 79 among populations during the colonization, but did not allow determining the sequence of  
 80 colonization of Europe, America and Morocco by *D. plantaginea*, likely because of the weak  
 81 genetic differentiation and the occurrence of gene flow among populations. Finally, we found  
 82 that *D. plantaginea* rarely hosts any other endosymbiotic bacteria than its obligate nutritional  
 83 symbiont *Buchnera aphidicola*. This suggests that secondary endosymbionts did not play any  
 84 role in the rapid spread of the rosy apple aphid. These findings have fundamental importance  
 85 for understanding pest colonization processes and implications for sustainable pest control  
 86 programs.

87

88 **Keywords:** colonization, expansion, pest, apple, aphid, endosymbiotic bacteria, *Buchnera*,  
 89 gene flow, ABC-RF.

90

## 91 **Introduction**

92

93 Understanding the evolutionary processes underlying the colonization of new environments  
 94 and the range expansion of species is a key goal in evolutionary biology (Angert, Bontrager,  
 95 & Ågren, 2020; Austerlitz, Jung-Muller, Godelle, & Gouyon, 1997; Excoffier, Foll, & Petit,  
 96 2009; Hoffmann & Curchamp, 2016; Rius & Darling, 2014). Crop parasites, with their  
 97 frequent shifts in hosts involving the colonization of new hosts across large geographic  
 98 ranges, are good models to study the mechanisms of rapid colonization and range expansion  
 99 (Garnas et al., 2016; Gladieux et al., 2014; Stukenbrock & McDonald, 2008). The key  
 100 questions relating to the evolutionary processes underlying the colonization, spread and  
 101 success of crop parasites pertain to the geographic origin of the source population, the  
 102 location of the migration routes, the extent to which genetic diversity is reduced via founder  
 103 effects (Blakeslee et al., 2019) and the extent of gene flow among populations during the  
 104 spread of the crop parasite (Stukenbrock, 2016). Current and future threats to biodiversity and  
 105 their consequences on ecosystem health and services make these questions more relevant than  
 106 ever. Understanding the routes of pest colonization contributes greatly to the efforts to protect  
 107 crops against future pest emergence and therefore has direct implications for breeding and  
 108 agronomic programs, that use crops and develop biological methods of parasite control  
 109 (Estoup & Guillemaud, 2010; Fraimout et al., 2017; Lawson Handley et al., 2011; Turcotte,  
 110 Araki, Karp, Poveda, & Whitehead, 2017).

111 Historically, gene genealogies have been a rich source of information into a species'  
 112 evolutionary history that could be applied to the study of colonization (Bloomquist, Lemey,  
 113 & Suchard, 2010; Hickerson et al., 2010; Posada & Crandall, 2001). The characterization of  
 114 population structure, genetic diversity and demographic history (divergence time, migration  
 115 rates among populations, and effective population size) are also essential to understand the  
 116 evolutionary processes underlying rapid colonization and range of geographic expansion

(Excoffier et al., 2009). Approximate Bayesian computation methods (referred to as “ABC” hereafter) provide a robust framework for inferring a species’ history by allowing the comparison of alternative demographic models and the estimation of their associated parameters (divergence time, migration rate, effective population size) (Bertorelle, Benazzo, & Mona, 2010; Csillery, Blum, & Francois, 2012; Csilléry, Blum, Gaggiotti, & François, 2010; Estoup, Raynal, Verdu, & Marin, 2018; Raynal et al., 2019; Roux & Pannell, 2015). The power of the ABC methods has made it possible to retrace the evolutionary history of notorious crop pathogens (*e.g.*, *Plasmopara viticola* (Berk & Curtis) Berl. & de Toni (Fontaine et al., 2020), *Microbotryum lychnidis-dioicae* (DC. Ex Liro) G. Deml & Oberw. (Gladieux et al., 2015)), insect crop pests (*e.g.*, *Batrocera dorsalis* Hendel (Aketarawong et al., 2014), *Drosophila suzukii* Matsumura (Frainout et al., 2017), *Daktulosphaira vitifoliae* Fitch (Rispe et al., 2020)) and invasive alien species posing a threat to the native fauna (*e.g.*, *Harmonia axyridis* Pallas (Lawson Handley et al., 2011)). These studies have identified the source populations, reconstructed complex colonization routes and determined the pace of geographic range expansion, often emphasizing the role of human transportation in the spread of these noxious species. Recently, the ABC approach, combined with machine learning (*i.e.*, random forest, referred to as “ABC-RF” hereafter, (Estoup et al., 2018; Raynal et al., 2019)), was used to demonstrate that the African arid-adapted locust pest species *Schistocerca gregaria* Forsskål colonized Africa through major migration events driven by the last glacial climatic episodes (Chapuis et al., 2020). Yet, ABC methods are underused for estimating the extent of gene flow during parasite colonization (but see (Frainout et al., 2017)). Most studies assume punctual admixture events among populations, but rarely continuous gene flow per generation among populations. Only recently has the new ABC-RF approach been used to infer the invasion routes, evolutionary history and extent of gene flow in the spotted-wing *D. suzukii* Matsumura from microsatellite markers (Frainout et al., 2017) (referred to as

SSR for simple sequence repeat hereafter). Beyond population genomics approaches, and in the special case of insect pests, the investigation of colonization history could also benefit from the characterization of insect endosymbiotic bacterial communities. Indeed, many insect pests host a consortium of endosymbiotic bacteria that mediate their adaptation to new environmental conditions (Frago, Zytynska, & Fatouros, 2020). Variations in the endosymbiotic consortium along colonization routes could facilitate the rapid adaptation of insect pests to different environments (Lenhart & White, 2020) and therefore its spread. Alternatively, if the colonization stems from only a few populations, it might actually be accompanied by a loss of endosymbiont diversity along the colonization routes.

Aphids provide a model system for the study of the evolutionary biology and ecology of insect pests. These major pests infest a wide range of host species, in particular crop plants (Blackman & Eastop, 2000). Some aphid species have now become cosmopolitan following the dissemination of crops around the globe (Brady et al., 2014; Kirk, Dorn, & Mazzi, 2013; Zepeda-Paulo et al., 2010; Zhang, Edwards, Kang, & Fuller, 2014). Aphids are therefore a good study system to investigate the evolutionary processes involved in range expansion and the colonization of new environments. The clonal reproduction of aphids during spring and summer is one of the reasons put forward to account for their remarkable success worldwide. Indeed, asexual reproduction allows for a rapid increase in population size after the colonization of a favorable new environment (Simon, Rispe, & Sunnucks, 2002; Simon, Stoeckel, & Tagu, 2010). So far, only a handful of studies have reconstructed the colonization history of aphid crop pests by combining population genetics approaches using SSR as well as sequence and single nucleotide polymorphism (SNP) markers (Fang, Chen, Jiang, Qu, & Qiao, 2018; Giordano et al., 2020; Kim, Hoelmer, & Lee, 2016; Morales-Hojas, Sun, Iraizoz, Tan, & Chen, 2020; Peccoud et al., 2008; Piffaretti et al., 2013; Zepeda-Paulo et al., 2010; Zhang et al., 2014, 2014; Zhou et al., 2015). These studies demonstrated that aphid

species can spread very quickly across the world, probably via plants transported by humans and/or wind dispersal. Colonization was found to involve several populations with high genetic diversity, possibly with gene flow (Wang, Hereward, & Zhang, 2016; Wei, Zuorui, Zhihong, & Lingwang, 2005) and/or a few “super-clones”, *i.e.*, predominant genotypes widespread in space and time (Vorburger, Lancaster, & Sunnucks, 2003)), which are highly differentiated from each other and have high dispersal capacities (Piffaretti et al., 2013). Assessing the genetic diversity and structure, the extent of gene flow among populations in aphids are therefore central to determining the evolutionary processes that have taken place during aphid colonization.

It can be interesting to associate the reconstruction of aphid colonization history with the characterization of their endosymbiotic bacterial community. Aphids indeed harbor both obligate symbionts that supply them with the nutrients that are missing from their diet (Buchner, 1965) and facultative symbionts that can provide various selective advantages in specific environmental conditions (Haynes et al., 2003; Oliver, Degnan, Burke, & Moran, 2010). The aphid obligate endosymbiont bacterium *Buchnera aphidicola* has strictly cospeciated with most aphid species (Jousselin, Desdevise, & Coeur d’acier, 2009). Bacterial markers (*e.g.*, *TrpB*), along with typical other markers (*e.g.*, *COI* or *Cytb* for instance), can be used to infer the phylogenetic history of aphid species and to investigate signal of recent range expansions (Popkin et al., 2017; Zhang et al., 2014). Beyond the use of bacterial genomes as a way to reconstruct aphid phylogeography, the study of the composition of the bacterial populations in aphids might also help assessing the importance of facultative bacteria for colonizing new geographic regions. Many studies have investigated the variation in bacterial communities associated with the pea aphid (*Acyrtosiphon pisum* Harris), showing geographical variation, host-specific differentiation and also an association with environmental factors such as temperature (Russell et al., 2013; Tsuchida, Koga, Shibao,

Matsumoto, & Fukatsu, 2002; Zepeda-Paulo, Ortiz-Martínez, Silva, & Lavandero, 2018). The effect of endosymbionts on aphid fitness has been confirmed experimentally in certain cases (*e.g.*, (Frago et al., 2017; Leclair et al., 2016). Nevertheless, studies on a global scale in non-model aphid species are still scarce (Zytynska & Weisser, 2016), and there are as of yet no studies simultaneously investigating the migration routes of an aphid species and the changes in symbiotic associations along this route.

*Dysaphis plantaginea* Passerini, the rosy apple aphid, is one of the most harmful aphid pests attacking cultivated apple trees (*Malus domestica* Borkh), causing major economic losses every year, especially in Europe, North Africa and North America (Guillemaud, Blin, Simon, Morel, & Franck, 2011; Warneys et al., 2018; Wilkaniec, 1993). This aphid species occurs across temperate regions (Central and Southwest Asia, North Africa, America, and Europe) (Blackman & Eastop, 2000) in cultivated apple orchards. The rosy apple aphid completes its life cycle on two successive host plants: the cultivated apple trees as its sole primary host plant, from early autumn to late spring, and the plantain herb *Plantago* spp. as a secondary host plant during summer (Bonnemaison, 1959). The rosy apple aphid reproduces via asexual reproduction (parthenogenesis) and sexual reproduction, the latter takes place in autumn when females lay fertilized overwintering eggs on apple trees. Eggs hatch in early spring (Blommers, Helsen, & Vaal, 2004). The rosy apple aphid is closely related to other aphid genera found on fruit trees, namely the genus *Myzus*, *Aphis* and *Brachycaudus* (Choi, Shin, Jung, Clarke, & Lee, 2018; Coeur d'acier et al., 2014). While its phylogenetic relationships with other aphid species is quite well resolved, the evolutionary history of *D. plantaginea* has been little explored to date (but see (Guillemaud et al., 2011)). The native range of *D. plantaginea* and its ancestral host range is not known. It might have been ancestrally associated with *Malus sieversii*, the primary ancestor of the cultivated apple (*M. domestica*) (Harris, Robinson, & Juniper, 2002), and then colonized Europe during the

journey of the cultivated apple along the Silk Routes from Asia to Europe. Alternatively, the rosy apple aphid may have colonized its cultivated apple host in Europe rapidly and recently, about 1,500 years ago when the Greeks brought the cultivated apple to Europe from Central Asia (Cornille et al., 2019; Cornille, Giraud, Smulders, Roldán-Ruiz, & Gladieux, 2014). These scenarios are derived from our knowledge of the domestication history of apples; there is no data on the rosy apple aphid that supports these scenarios. The migration routes of the rosy apple aphid are therefore still unknown. Only some historical records show that the introduction of the rosy apple aphid was very recent in America (*ca.* 1890s) (Footitt, Halbert, Miller, Maw, & Russell, 2006). More generally, the population structure and the extent of gene flow among populations throughout the geographic distribution of *D. plantaginea* is largely unknown, especially in the regions where it causes the most damages in apple orchards, *i.e.*, North America, North Africa and Europe. There is also no data so far on the diversity of endosymbionts across a large geographical range in aphids.

Here, we therefore investigated the colonization history of this major fruit tree pest using multiple approaches and genetic datasets, sampling from comprehensive collections from Europe, North America and Morocco, on the primary host, the cultivated apple. Note that, despite repeated attempts, we failed to sample *D. plantaginea* from its putative source population in Central Asia, in the center of origin of apple trees, preventing to fully address its colonization history starting from there. Therefore, we aimed to answer the following questions focusing on the most damaged regions by the rosy apple aphid, *i.e.*, Europe, North America and North Africa: i) What is the spatial genetic diversity and population structure of *D. plantaginea* across Europe, the US and Morocco? Can we detect genetically diverse populations, and/or recent bottlenecks in colonizing populations? ii) Did gene flow occur among populations during colonization? iii) Did *D. plantaginea* populations lose or gain symbionts during their colonization?

242

## 243 **Material and Methods**

### 244 **Samples and DNA extraction**

245 Each sample described hereafter consisted of a single aphid colony of 10-15 females  
 246 collected on a host plant during the spring of 2017 and 2018. Sampling only one colony per  
 247 tree ensured that the sample did not contain different clones, which can occur on the same  
 248 tree. Each colony was kept in ethanol (96%) at -20°C until DNA extraction. For the three  
 249 methods described below (*i.e.*, SSR genotyping, Sanger sequencing of the aphid  
 250 mitochondrial *COI*, *Cytb* markers, and *TrpB* bacterial marker, and metabarcoding of the 16S  
 251 rRNA bacterial marker), DNA was isolated from a single individual per colony using a new  
 252 standardized protocol (Supplementary material Text S1). For the sake of simplicity, colonies  
 253 are referred to as ‘individuals’ or ‘samples’ hereafter. Note that samples used for 16S rRNA  
 254 sequencing underwent two extra chemical washes before DNA extraction to remove the  
 255 external bacteria that could be present on the aphid’s cuticle. The extra chemical washes  
 256 consisted of a first wash with dithiothreitol/DTT (50 mM) for 4 minutes, followed by a  
 257 second wash with potassium hydroxide/KOH (200 mM) for 4 minutes. The KOH wash was  
 258 performed twice. Five controls were also included ((Jousselin et al., 2016), Table S1).

259 Different sample sizes were used for each of the three methods (*i.e.*, SSR genotyping,  
 260 metabarcoding of the 16S rRNA bacterial marker, Sanger sequencing of the aphid *COI*, *Cytb*  
 261 and *TrpB* markers). For each sample, the locality, sample collector identity, host plant  
 262 species, latitude, longitude and use in this study (genotyping, Sanger sequencing and/or  
 263 metabarcoding) are given in Table S1.

264 The largest sample was collected for SSR genotyping, comprising 667 *D. plantaginea*  
 265 samples (colonies) from Europe, Morocco and the US, from three hosts: *M. domestica* (50  
 266 sites, *i.e.*, orchards,  $N = 654$ ), but also *M. sylvestris* (one site, Alta Ribagorça in Spain,  $N = 7$ ),

the European wild apple, and *P. lanceolata* (one site, Loos-en-Gohelle in France,  $N=6$ ). The 667 samples originated from 52 different geographic sites (*i.e.*, 52 orchards) spread over 13 countries; seven to 15 individuals were collected at each site (Table S1, Figure S1). We tried to obtain samples from Eastern Asia and Central Asia during fieldwork in 2017 and 2018, and through our collaborative network. However, despite our attempts and although *D. plantaginea* is referenced in the literature on various hosts in several Central Asian countries (Aslan & Karaca, 2005; CAB International, 2020; Holman, 2009), it was not observed in these areas.

For the investigation of the bacterial 16S rRNA region, we used 178 *D. plantaginea* individuals out of the same 667 colonies used for SSR genotyping (Table S1). We selected two to three samples (colonies) per site to cover a wide and even spatial distribution across Europe, North America and Morocco. The selected 178 individuals were collected across 12 countries on *M. domestica*, except eight on *M. sylvestris* (Table S1).

For Sanger sequencing of *COI*, *TrpB* and *CytB*, we used a total of 84 samples belonging to eight aphid species (*D. plantaginea*, *Dysaphis* sp., *Aphis citricola* van der Goot, *Aphis pomi* de Geer, and *Aphis spiraecola* Patch, *Melanaphis pyrararia* Passerini, *Myzus persicae* Sulzer, *Rhopalosiphum insertum* Walker) sampled on five host plant species (*M. domestica*, *M. sylvestris*, *Sorbus aucuparia*, *Prunus persica*, *Pyrus communis*). The species were chosen to represent the aphid genus known to be closely related to the rosy apple aphid (Choi et al., 2018). One to three individuals from each of the geographic sites listed above and in Table S1 were sampled, for a total of 67 samples for *D. plantaginea*. The 17 additional samples from seven other aphid species (one to two samples per aphid species) were collected on the cultivated apple and other fruit tree species (Table S1).

## PCR and Sanger sequencing

We amplified the coding regions from the aphid mitochondrial cytochrome c oxidase subunit I (*COI*) gene and the cytochrome B (*CytB*) gene. Fragments were amplified following the protocol reported in Popkin et al. (2017) with some modifications (Table S2). The final PCR volume was 30  $\mu$ L, containing Buffer (1X),  $MgCl_2$  (1.5 mM), dNTP (0.1 mM), Forward and Reverse primers (0.7  $\mu$ M), 5  $\mu$ L of Taq polymerase (1 U), and 5  $\mu$ L of DNA (1/10 dilution). Amplification products were visualized on an agarose gel 1.5% stained with ethidium bromide under ultraviolet light. We prepared four 96-well plates with 15  $\mu$ L of PCR products and a negative control. Plates were sent to Eurofins Genomics France SAS for sequencing.

Chromatograms were inspected and corrected with CodonCode Aligner version 8.0.1 ([www.codoncode.com](http://www.codoncode.com)). Alignment, evaluation of all coding genes for frameshifts and elimination of pseudogenes were performed with MEGA version 7.0.26 (Kumar, Stecher, & Tamura, 2016). The neutral evolution of each gene, and thus its suitability for phylogenetic and population genetic analyses, was assessed with the McDonald and Kreitman test (Egea, Casillas, & Barbadilla, 2008; McDonald & Kreitman, 1991) (Table S3). Two samples of *Brachycaudus helichrysi* Kaltenbach, a pest of *Prunus*, for which sequences of *COI* (NCBI sequence identifiers: KX381827.1, KX381828.1), *CytB* (KX381989.1, KX381990.1), and *TrpB* (KX382153.1, KX38215.1) were available (Popkin et al., 2017), were used as outgroup. Sequences were concatenated, resulting in a data matrix of 86 concatenated sequences.

### **Phylogenetic tree and taxonomic assignation**

We checked the taxonomic assignation of the samples used in this study by running a phylogenetic analyses including *D. plantaginea* and other aphid species found on fruit trees with a Bayesian approach implemented in MrBayes v3.2.7 (Huelsenbeck & Ronquist, 2001), using the GTR “Generalized time-reversible” mutational model. The two *M. pyrraria* individuals were used as an external group. We chose the default parameters (unlink statefreq

= (all) revmat = (all) shape = (all); prset applyto = (all) ratepr = variable; mcmcp ngen = 1000000 nruns = 2 nchains = 4 samplefreq = 1000 printfreq = 1000). Inferred trees were visualized with FigTree v1.4 (<http://tree.bio.ed.ac.uk/software/figtree/>).

## SSR genotyping

We used 30 SSR markers, including one that was previously used for *D. plantaginea* (Guillemaud et al., 2011), and 29 that were newly developed from the sequencing of a low coverage genome (see details of the protocol in supplementary material Texts S2 and S3). We tested the neutrality of the 29 SSR markers using the Ewens-Watterson neutrality test ((Watterson, 1978); Text S3 and Table S4). Each SSR was amplified separately by PCR. PCR was performed in a final volume of 20  $\mu$ L (0.2  $\mu$ M of each forward and reverse primer, with the forward primer labeled with a fluorescent dye, 0.2  $\mu$ M of dNTPs, between 1 and 1.5 mM of  $MgCl_2$ , 1X Buffer (5X), 2  $\mu$ L of a homemade Taq, 5  $\mu$ L of DNA (1/30 dilution) and sterile  $H_2O$  to reach the final volume). We used the following PCR program: 94°C for 5 minutes, followed by 35 cycles of 30s at 94°C, 30s at 60 to 65°C and 45s at 72°C, then 5 minutes at 72°C and finally 10 minutes at 4°C. In the PCR program, the annealing temperature varied between 55°C and 65°C. Annealing temperatures for each SSR marker are detailed in Supplementary Material Table S5. PCR products were then pooled according to the four multiplexes described in Table S5.

SSR genotyping was performed at the Gentyane platform (INRAE, Clermont-Ferrand, France). Alleles of each SSR marker were identified, and their size scored with Genemapper v.4.0 (Applied Biosystems TM, Foster City, USA) by two people independently. In case of discrepancy, the electropherogram was triple checked for a final decision. Allele scoring resulting from Genemapper was then processed with the Autobin Excel Macro ([https://www6.bordeaux-aquitaine.inra.fr/biogeco\\_eng/Scientific-Production/Computer-](https://www6.bordeaux-aquitaine.inra.fr/biogeco_eng/Scientific-Production/Computer-)

[software/Autobin](#)). We retained only multilocus genotypes with less than 30% missing data and containing less than 5% of null alleles. Null alleles were detected with GENEPOP v4.7 (Rousset, 2008).

### **Clonal population structure**

Each individual was classified according to its multilocus genotype (*MLG*) with GenoDive 2.0b23 ((Meirmans & Van Tienderen, 2004), Table S1). We used the stepwise mutation model with a threshold of 0 and the corrected Nei's diversity index as a statistic to test clonal population structure. To reduce the influence of clonal copies produced by asexual reproduction on the Hardy–Weinberg equilibrium, allele frequency and genetic differentiation estimates, the dataset was pruned to include only one copy of each *MLG* for further analyses.

### **Population genetics descriptive statistics**

Observed and expected heterozygosity ( $H_O$  and  $H_E$ ) and inbreeding coefficient ( $F_{IS}$ ) were calculated with GENEPOP v4.7 (Rousset, 2008) from the SSR dataset for each SSR marker, each site (*i.e.*, geographic location/orchard) and each population (*i.e.*, clusters inferred with the STRUCTURE software, to comprise individuals with a membership coefficient of at least 62.5% to the given cluster, see results). The 62.5% cut-off was chosen based on the distribution of individual membership coefficients across the clusters detected for the most likely  $K$  value (see results). Pairwise genetic differentiation ( $F_{ST}$ ) between sites and between populations was also calculated with GENEPOP (Rousset, 2008). Only sites with at least five successfully genotyped samples were included for the site-specific computations. Allelic richness and private allelic richness for each site and each population were calculated with ADZE (Szpiech, Jakobsson, & Rosenberg, 2008) using a sample size corresponding to the

smallest number of observations per site or population, multiplied by two chromosomes (*e.g.*, a sample size of 20 represents ten individuals x two chromosomes).

We also estimated Nei's nucleotide diversity index  $\pi$  (Nei, 1987), Watterson's index  $\theta$  (Watterson, 1975), haplotype diversity, Tajima's  $D$  (Tajima, 1989) and Fu's  $F_s$  (Fu, 1997) with DNAsp (Rozas, Sánchez-DelBarrio, Messeguer, & Rozas, 2003) using the concatenated three-marker dataset (*i.e.*, *COI*, *TrpB* and *CytB*) for each population (*i.e.*, cluster inferred with STRUCTURE including individuals with membership coefficient > 62.5% to this cluster, see results).

### **Detecting recent bottlenecks during population range expansion**

We tested whether a bottleneck occurred during the range expansion of each population with the method implemented in BOTTLENECK (Cornuet & Luikart, 1996; Piry, Luikart, & Cornuet, 1999). Inferences regarding historical changes in population size are based on the assumption that the expected heterozygosity estimated from allele frequencies decreases faster than the expected heterozygosity estimated under a given mutation model at mutation-drift equilibrium in populations that have experienced a recent reduction in size. The tests were performed under the stepwise-mutation model (SMM) and a two-phase model (TPM) allowing for 30% multi-step changes.

### **Spatial distribution of allelic richness and observed heterozygosity**

Spatial patterns of allelic richness and observed heterozygosity were visualized by mapping the variation in allelic richness and observed heterozygosity at 48 sites in total (*i.e.*, sites with at least five individuals) with the geometry-based inverse distance weighted interpolation in QGIS (Quantum GIS, GRASS, SAGA GIS). The correlation between genetic variability ( $H_O$ ) and latitude, and between  $H_O$  and longitude, was tested using a linear model.

392

### 393 **Population subdivision**

394 We inferred the finest population structure by comparing the results obtained with three  
 395 population genetic tools: STRUCTURE 2.3.2 (Pritchard, Stephens, & Donnelly, 2000), TESS  
 396 2.3.1 (Chen, Durand, Forbes, & François, 2007), and a discriminant analysis of principal  
 397 components (DAPC) (Jombart, Devillard, & Balloux, 2010). STRUCTURE is based on the  
 398 use of Markov chain Monte Carlo (MCMC) simulations to infer the assignment of genotypes  
 399 to  $K$  distinct clusters. In addition to this, TESS also considers a spatial component, so that  
 400 genotypes from sites that are geographically closer to each other are considered more likely  
 401 to be in the same cluster. For both STRUCTURE and TESS, ten independent analyses were  
 402 carried out for each value of  $K$  ( $1 \leq K \leq 10$  and  $2 \leq K \leq 10$ , respectively) with 500,000  
 403 MCMC iterations after a burn-in of 50,000 steps. STRUCTURE and TESS outputs were  
 404 processed with CLUMPP 1.1.2 (Jakobsson & Rosenberg, 2007) to identify potentially  
 405 distinct modes (*i.e.*, clustering solutions) in replicated runs (10) for each  $K$ . We also assessed  
 406 the population subdivision with DAPC with the R package ‘adegenet’ (Jombart & Collins,  
 407 2015), which does not rely on any assumption about the underlying population genetics  
 408 model, in particular concerning Hardy-Weinberg equilibrium or linkage equilibrium. The  
 409 number of genetic clusters was investigated with the *find.cluster* function (Jombart & Collins,  
 410 2015; Ripley & Ripley, 2001), which runs successive K-means for clustering. The automatic  
 411 cluster selection procedure ‘*diffNgroup*’ was used with *n.iter* set to  $10^6$  and *n.start* set to  $10^3$ .  
 412 The ordination analysis (DAPC) was performed using the *dapc* function. The statistically  
 413 optimal number of principal components was assessed using the *optim.a.score* function.  
 414 Assessment of the samples assigned to a genetic cluster was performed using the *compoplot*  
 415 function.

We used Pophelper (Francis, 2016) to run the Evanno method on the STRUCTURE outputs. The Evanno method detects the strongest level of population subdivision (Evanno, Regnaut, & Goudet, 2005). For TESS, we used the rate of change of the deviation index criterion (*DIC*) to determine the amount of additional information explained by increasing *K*. For DAPC, we looked at the *BIC* obtained with the *adegenet* package to estimate the optimal *K* value. However, the *K* identified with the *DIC*, *BIC* and  $\Delta K$  statistics does often not correspond to the finest biologically relevant population structure (Cornille et al., 2015; Kalinowski, 2011; Puechmaille, 2016). We therefore visualized the bar plots with Pophelper (Francis, 2016) and choose the *K* value for which all clusters had well assigned individuals while no further well-delimited and biogeographically relevant clusters could be identified for higher *K* values. For further analyses, we considered an individual to be assigned to a cluster when its membership coefficient was  $\geq 62.5\%$  to this cluster (see results below).

The spatial pattern of genetic structure was visualized by mapping the mean membership coefficients for each site, as inferred from each of the tree population genetics structure analyses, with QGIS 3.12 ‘Las Palmas’ (<https://qgis.org>). We further explored relationships among populations with a principal component analysis (PCA, *dudi.pca*, *ade4* R package (Dray & Dufour, 2007)).

### **Isolation-by-distance**

We tested whether there was a significant isolation-by-distance (IBD) pattern. A Mantel test with 10,000 random permutations was performed between the individual coefficient of relatedness  $F_{ij}$  (Loiselle, Sork, Nason, & Graham, 1995) and the matrix of the natural logarithm of geographic distance. We also performed a correlation between  $F_{ST}/(1-F_{ST})$  and the natural logarithm of geographic distance. These analyses were performed using SPAGeDI

1.3 (Hardy & Vekemans, 2002) separately for each *D. plantaginea* population (*i.e.*, cluster containing individuals with a membership coefficient  $> 0.625$ ) identified with TESS, STRUCTURE, and DAPC.

#### **Demographic and divergence history using ABC-RF**

We used approximate Bayesian computation to investigate whether the spatial patterns of genetic clustering, diversity and differentiation observed in *D. plantaginea* resulted from the occurrence of gene flow among populations during colonization. We also attempted to infer the relative sequence of colonization events in each population. We used the newly developed ABC method based on a machine learning tool named “random forest” (ABC-RF) to perform model selection and parameter estimations (Estoup et al., 2018; Pudlo et al., 2016; Raynal et al., 2019). In brief, this method creates a “forest” of bootstrapped decision trees to classify scenarios based on the summary statistics of the datasets. Some simulations are not used to build the trees and can thus be used to cross-validate the analysis by computing a “prior error rate”. This approach allows the comparison of complex demographic models (Pudlo et al., 2016) by comparing groups of scenarios with a specific type of evolutionary event with other groups with different types of evolutionary events (instead of considering all scenarios separately) (Estoup et al., 2018).

We used a nested ABC approach with two key steps. First, we inferred the divergence and demographic history of the rosy apple aphid in Europe (step 1). Then, we tested the divergence and demographic history of the rosy apple aphid outside of Europe (step 2). Each ABC step compared different sequences of colonization events, with and without bidirectional gene flow among populations (Figure S2). This two-step nested approach avoids the need to compare models that are too complex, which would require the simulation of too many populations and parameters, and is more powerful than testing all scenarios

individually to determine the main evolutionary events that characterize demographic history and divergence (Estoup et al., 2018). Populations were defined as the clusters detected with STRUCTURE (see results), removing putative hybrid individuals (*i.e.*, individuals with a membership coefficient < 0.25 to any given cluster). The model parameters used were: the divergence time between  $X$  and  $Y$  populations ( $T_{X-Y}$ ), the effective population size of population  $X$  ( $N_{E-X}$ ), the migration rate per generation between  $X$  and  $Y$  populations ( $m_{X-Y}$ ). Prior values for divergence time were drawn for the log-uniform distribution bounded between the distributions used in the approximate Bayesian computations, and are given in Table S6.

For all models, identical SSR datasets were simulated for 29 out of the 30 markers that had perfect repeats (we excluded the L4 marker because it did not have perfect repeats, Tables S4 and S5), increasing confidence in the simulated model. We preliminarily checked that the population structure inferred with 29 SSR markers did not differ significantly from the inferences obtained with 30 SSR markers (data not shown). We assumed a generalized stepwise model of SSR evolution. Mutation rates were allowed to vary across loci, with locus-specific mutation rates drawn from a gamma distribution ( $\alpha$ ,  $\alpha/\mu$ ) where  $\mu$  is the mutation rate per generation and  $\alpha$  is a shape parameter. We assumed a log-uniform prior distribution for  $\mu$  (1e-4, 1e-3) and a uniform distribution for  $\alpha$  (1.30).

We used ABCtoolbox (Wegmann, Leuenberger, Neuenschwander, & Excoffier, 2010) with fastsimcoal 2.5 (Excoffier & Foll, 2011) to simulate datasets, using model parameters drawn from prior distributions (Table S6). We performed 10,000 simulations per scenario. For each simulation, we calculated six summary statistics per population with arlsumstats v 3.5 (Excoffier and Lischer 2010):  $H$ , the mean heterozygosity across loci,  $sd(H)$ , the standard deviation of the heterozygosity across loci,  $GW$ , the mean Garza-Williamson statistic across loci (Garza and Williamson, 2001),  $sd(GW)$ , the standard deviation of the mean Garza-

Williamson statistic over populations,  $NGW$ , the mean modified Garza-Williamson statistic over loci,  $sd(NGW)$ , the standard deviation of the mean modified Garza-Williamson statistic over populations. We also computed pairwise  $F_{ST}$  (Weir and Cockerham, 1984) and genetic distances  $(\delta\mu)^2$  (Goldstein et al., 1995) between pairs of populations.

We used the abcrf v.1.7.0 R statistical package (Pudlo et al., 2016) to carry out the ABC-RF analysis. This analysis provides a classification vote that represents the number of times a scenario is selected as the best one among  $n$  trees in the constructed random forest. For each ABC step, we selected the scenario, or the group of scenarios, with the highest number of classification votes as the best scenario, or best group of scenarios, among a total of 500 classification trees (Breiman, 2001). We computed the posterior probabilities and prior error rates (*i.e.*, the probability of choosing a wrong group of scenarios when drawing model index and parameter values from the priors of the best scenario) over 10 replicate analyses (Estoup et al., 2018) for each ABC step. We also checked visually that the simulated models were compatible with the observed dataset by projecting the simulated and the observed datasets onto the two first linear discriminant analysis (LDA) axes (Pudlo et al., 2016), and checking that the observed dataset fell within the clouds of simulated datasets. We then calculated parameter inferences using the final selected model following the three-round ABC procedure. Note that the ABC-RF approach includes the model checking step that was performed *a posteriori* in previous ABC methods.

## **Characterization of the symbiotic bacterial community using the 16S rRNA bacterial gene**

In order to investigate symbiont diversity, we amplified a 251 bp portion of the V4 region of the 16S rRNA gene (Mizrahi-Man, Davenport, & Gilad, 2013) and used targeted sequencing of indexed bacterial fragments on a MiSeq (Illumina) platform (Kozich, Westcott, Baxter,

Highlander, & Schloss, 2013) following the protocol described in (Jousselin et al., 2016). We used 178 aphid DNA extracts (Table S1), comprising 175 *D. plantaginea* individuals and three *M. pyrraria* individuals, which represent the range of our sampling (Table S1). We also added eight randomly chosen samples that did not undergo the two extra chemical washes (see Material and methods, and Table S1). Each sample was amplified twice along with negative controls (DNA extraction and PCR controls). PCR replicates were conducted on distinct 96-well microplates. We obtained a total of 390 PCR products (186 DNA extracts, by 2 for PCR duplicates, plus PCR controls), which were pooled and then separated by gel electrophoresis. Bands based on the expected size of the PCR products were excised from the gel, purified with a PCR clean-up and gel extraction kit (Macherey-Nagel), and quantified with the Kapa Library Quantification Kit (Kapa Biosystems). Paired-end sequencing of the DNA pool was carried out on a MISEQ (Illumina) FLOWCELL with a 500-cycle Reagent Kit v2 (Illumina).

We first applied sequence filtering criteria following Illumina's quality control procedure. We then used a pre-processing script from (Sow et al., 2019) to merge paired sequences into contigs with FLASH V.1.2.11 (Magoč & Salzberg, 2011) and trim primers with CUTADAPT v.1.9.1 (Martin, 2011). We then used the FROGS pipeline (Escudié et al., 2018) to generate an abundance table of symbiont lineages across samples. In brief, we first filtered out sequences  $> 261$  bp and  $< 241$  bp with FROGS, then we clustered variants into operational taxonomic units (OTUs) with SWARM (Mahé, Rognes, Quince, Vargas, & Dunthorn, 2014) using a maximum aggregation distance of three. We identified and removed chimeric variants with VSEARCH (Rognes, Flouri, Nichols, Quince, & Mahé, 2016). We only kept OTUs that were present in both PCR replicates of the same sample and then merged the number of reads for each OTU for each aphid sample.

Taxonomic assignment of OTUs was carried out using RDPtools and Blastn (Altschul, Gish, Miller, Myers, & Lipman, 1990) against the Silva138-16s database (<https://www.arb-silva.de>) as implemented in FROGS. From the abundance table of OTUs across samples, we transformed read numbers per aphid sample into frequencies (percentages); sequences accounting for < 0.5 % of all the reads for a given sample were excluded following Jousselin *et al.* (2016). All filters resulted in excluding reads found in low abundance that could represent sequencing errors and which were also often found in the negative controls.

## Results

### Taxonomic status of aphid samples

The Bayesian phylogenetic tree built with the 86 sequences representing nine aphid species resulted in a polytomy for the 67 *D. plantaginea* samples from Europe, Morocco, and the USA, showing very little sequence variation at the intraspecific level (low bootstrap values < 0.6, Figure S3a). We therefore kept only two representatives out of the 67 *D. plantaginea* individuals in subsequent phylogenetic analyses. Bayesian analysis of this pruned dataset comprising 19 individuals representing nine aphid species confirmed known phylogenetic relationships in Aphidinae (Choi *et al.*, 2018), Figure S3b). The species *A. pomi*, *A. citricola* and *A. spiraecola* were grouped in the same clade, the three species appearing polyphyletic (Figure S3b). *Dysaphis plantaginea* appeared closely related to other members of the Macrosiphini tribe (*B. helichrysi* and *M. persicae*). Interestingly, the samples from Iran clustered apart from the *D. plantaginea* clade, the former belonging to the *Dysaphis* sp. species. This result suggests that the two *D. sp.* Iranian samples belong to a yet unidentified species, or resulted from strong intraspecific differentiation. Those two samples were not

included in the population genetics analyses using SSR, as we only had two representants from this Caucasian region (Table S1).

### **Clone detection**

Overall, the proportion of unique genotypes was variable among sites. We found 582 unique genotypes, including 29 unique genotypes that were represented by 85 clones. Clones therefore represented 85 individuals (12.7% of the total dataset, Table S7), mainly coming from Belgium, (86% of the clones, eight sites; mean proportion of unique genotypes (mean  $G/N = 0.36 \pm 0.2$ ), Bulgaria (6%, one site,  $G/N = 0.67$ ), France (5%, three sites, mean  $G/N = 0.87 \pm 0.05$ ), the USA (1 %, one site;  $G/N = 0.93$ ), Spain, (1%, one site;  $G/N = 0.91$ ) and from the lab-reared aphids (1%,  $G/N = 0.09$ ). We only kept the 582 unique genotypes for the analyses presented below.

### **Spatial distribution of allelic variation**

The map of allelic richness (Figure 1a) showed that genetic diversity decreased along a north-east to south-west gradient, with the highest allelic richness found in northeastern Europe and the lowest in Morocco and the USA, except for Belgium that showed a lower level of genetic diversity. We found a significant correlation between allelic richness and longitude ( $r = 0.2294$ ,  $P\text{-value} = 0.000573$ ), and between allelic richness and latitude ( $r = 0.2684$ ,  $P\text{-value} = 0.000162$ ). The map of observed heterozygosity (Figure 1b) confirmed that genetic diversity decreased along a north-east to south-west gradient, with the highest allelic richness in Denmark and the lowest in Morocco. We found a significant correlation between observed heterozygosity and longitude ( $r = 0.1731$ ,  $P\text{-value} = 0.00327$ ), and between observed heterozygosity and latitude ( $r = 0.4998$ ,  $P\text{-value} = 1.95\text{e-}08$ ).

## Population structure and subdivision

The spatial genetic structures of *D. plantaginea* inferred with TESS, DAPC and STRUCTURE, and the respective  $DIC$ ,  $BIC$ , and  $\Delta K$ , are shown in Figure 2 and supplementary material Figures S4 to S9. For each  $K$  value, CLUMPP analyses produced highly similar clustering patterns among the 10 repetitions (average  $G' > 95\%$ ). We therefore only present here the major modes.

With TESS, increasing  $K$  above 3 did not reveal any additional cluster (Figure S4). For  $K = 3$ , TESS analyses revealed a clear partition between the Moroccan samples (blue), and other samples (European and North American, orange). An additional cluster was identified comprising only one Italian individual (yellow) (Figure 2a). With DAPC, increasing  $K$  above 4 did not reveal well-delimited new clusters, *i.e.*, the new clusters were only individuals with multiple admixtures (Figure S5). For  $K = 4$ , DAPC identified three well-delimited clusters (Figure 2b): one in Eastern Europe (*i.e.*, Bulgaria, Italy and Romania, in yellow), one in Morocco (blue), one in the USA (orange), plus another cluster that comprised the rest of the Western European (Spain, France, Belgium, the UK) and Danish samples (pink). With STRUCTURE, increasing  $K$  above 5 did not reveal additional clusters. For  $K = 5$  (Figure 2c), samples were partitioned as follows: Morocco (blue), the USA (orange), Spain (pink), Eastern Europe and Italy (green), and Western Europe and Denmark (yellow).

We used the inferences from the STRUCTURE analysis in subsequent analyses because it revealed the finest population genetic structure. Genotypes were then assigned to a given population if their membership coefficient for that population exceeded 0.625 (Table 1 and Table S1). We chose this threshold based on the bimodal distribution of membership coefficients inferred with STRUCTURE (Figure S10). A total of 175 individuals (30% of the

dataset) could not be assigned to any population and were not included in subsequent analyses.

We further visualized and quantified the genetic differentiation among populations with a principal component analysis (PCA, Figure 2d) and  $F_{ST}$  estimates (Figure 2e), respectively. Among all populations,  $F_{ST}$  values were low but all significant (Figure 2e). Pairwise genetic differentiation was the lowest between the European populations ( $F_{ST} = 0.02$ ,  $P\text{-value} < 0.0001$ , Figure 2e); the Moroccan and US populations were the most differentiated (Figure 2e). The PCA showed similar genetic relationships among the five populations (Figure 2d).

### **Genetic diversity, bottleneck and range expansion**

The mean expected heterozygosity was relatively high (average = 0.74 with values ranging from 0.55 to 0.75, Table S8). The mean  $F_{ST}$  across all loci was low (mean  $F_{ST} = 0.08$ , range: - 0.006 - 0.5) but significant for all pairs of sites ( $P\text{-value} < 0.001$ , Figure S11).

Allelic richness and private allelic richness were significantly different among the five populations, except between the American and Moroccan populations for allelic richness, and among the Spanish, Moroccan and Eastern European populations for private allelic richness (Table S9). The North American and Moroccan populations showed significantly lower levels of allelic richness and private allelic diversity compared to the European populations (*i.e.*, Spanish, Eastern and Western European populations; Tables 1 and S9). In Europe, the Eastern European/Italian population had the highest level of allelic richness and private allelic diversity, followed by the Western European/Danish population, and lastly the Spanish population.

We also tested whether a strong and recent bottleneck occurred for each population. BOTTLENECK analyses showed no significant deviation from the mutation-drift

equilibrium in any of the populations (Table S10). Tajima's  $D$  and Fu's  $F_S$  statistics did not reveal any signature of demographic range expansion either (Table 1).

### **Isolation-by-Distance (IBD)**

A significant but weak IBD pattern was observed ( $r=0.057$ ,  $P\text{-value} \leq 0.05$ ) for the rosy apple aphid (Figure S11). The  $S_p$  statistic can be used to quantify spatial structure and is useful for comparing populations and/or species. Low  $S_p$  values are associated with greater dispersal capacities and/or effective population sizes. Here,  $S_p$  values were extremely low (close to 0) and were only significant for the Moroccan and the Western European/Danish populations (Table 1). These results suggest that *D. plantaginea* has high dispersal capacities and/or large effective population sizes.

### **Inference of the divergence and demographic history of the rosy apple aphid**

First, we reconstructed the divergence and demographic history of the rosy apple aphid in Europe (*i.e.*, including only the Spanish, Eastern European/Italian and Western European/Danish populations). We defined 12 scenarios assuming different divergence histories of the Eastern European/Italian, Western European/Danish and Spanish populations (Figure S2). The 12 scenarios were tested with and without gene flow among populations. We therefore ended up comparing 24 scenarios. Classification votes from the first round were the highest ten times out of ten for the group of scenarios that assumed gene flow among the three populations (295 votes out of the 500 RF trees, posterior probability  $P = 0.61$ , prior error rate = 3.04%, Table S12, Figure S12). Projection of the reference table datasets and the observed dataset on a single axis showed that the observed data fell within the distribution of the simulated summary statistics of the group of scenarios that assumed gene flow among the three populations, suggesting this analysis had the power to discriminate between the two

groups of scenarios and to identify the most likely scenario (Figure S12). The second round of ABC inferences testing the sequence of colonization of the European populations requires caution in interpretation as prior error rates were high and posterior probabilities low (Figure S12 and Table S13).

We then investigated the colonization history of the rosy apple aphid outside of Europe, *i.e.*, of the Moroccan and American populations. Given the lack of power to discriminate between different scenarios of colonization sequence of the rosy apple aphid in Europe, and the weak genetic differentiation among the three European populations (mean  $F_{ST}$  = 0.02, Figure 2e), we merged the three European populations into a single European population ( $N = 316$ ) for this analysis. We then defined six scenarios of sequence of colonization starting either from Europe or Morocco (Figure S2). We excluded the hypothesis that the rosy apple aphid originated in North America. Indeed, historical records show that the introduction of the rosy apple aphid was very recent in America (*ca.* 1890s) (Footitt et al., 2006). Furthermore, the American population had the lowest levels of private allelic diversity and allelic richness, and the American samples clustered with the European samples in the DAPC and TESS analyses. For each of the six scenarios, five scenarios of gene flow among populations were tested: no gene flow, gene flow among all populations and gene flow between each population pair (*i.e.*, Europe/Morocco, Europe/the USA, and Morocco/the USA). We assumed these specific models of gene flow among specific pairs of populations for the ABC-RF as we observed variable admixtures among populations (Figure 3c). In total, 30 scenarios were compared (six colonization sequences x five gene flow modes, Figure S2). ABC-RF analyses showed relatively high support for scenarios assuming gene flow (ABC-RF round 1, 10 out of the 10 replicates for the groups of scenarios assuming gene flow, 337 votes out of the 500 RF trees, posterior probability  $P = 0.65$ , prior error rate = 6.55%, Table S14, Figure S13). Projection of the reference table datasets and the observed dataset on a

single axis showed that the observed data fell within the distribution of the simulated summary statistics of the group assuming gene flow, suggesting this analysis infer the occurrence of gene flow (Figure S13). However, although the observed dataset fell within the distribution of simulated summary statistics (Figure S13), we lacked of power to infer the sequence of colonization of the rosy apple aphid outside of Europe (*i.e.*, posterior probability  $P = 0.65$ , and high prior error rate = 73.82%, Table S15).

Altogether, ABC-RF inferences supported the occurrence of gene flow during the colonization history of *D. plantaginea*. However, ABC-RF did not allow to determine the sequence of colonization of Europe, America and Morroco by the rosy apple aphid.

#### **16S rRNA amplicon sequencing**

After sequence filtering using the FROGS pipeline, high-throughput sequencing of 16S rRNA bacterial genes from 186 aphids resulted in 5.7 M sequencing reads with an average of 30,800 reads per aphid sample. We found an extremely low diversity of bacterial symbionts in *D. plantaginea*. The 5.7 M sequencing reads were clustered into 18 OTUs (Figure S15, Table S1). Seven OTUs were assigned to *B. aphidicola* and made up 97.8% of the sequencing reads (92 % of the reads were assigned to a single *B. aphidicola* OTU, which was found associated with all *D. plantaginea* individuals, the remaining *B. aphidicola* OTUs were found associated with “outgroups”). The remaining reads were mainly assigned to two known aphid endosymbionts, *Serratia symbiotica* and *Regiella insecticola*, which were found in eight and three aphid specimens, respectively. The three aphids hosting *Regiella* belonged to a population of *M. pyraia* collected in Switzerland, while aphids hosting *Serratia* were found in distantly related populations including *D. plantaginea* collected on *M. domestica* from various apple orchards in France, and in Iran on *P. communis* (Table S1). These results highlighted the extremely limited diversity of symbionts across a large geographical scale.

715

## 716 **Discussion**

717 We investigated the demographic history of a major fruit tree pest, the rosy apple aphid, in  
 718 the regions where it impacts the most cultivated apple orchards (*i.e.*, Europe, North Africa  
 719 and North America). Using multiple lines of evidence, we showed that the colonization of  
 720 Europe by the rosy apple aphid is likely recent, did not involve strong bottlenecks, and did  
 721 involve gene flow between and within populations. The high level of gene flow among  
 722 populations and within populations was supported by the weak spatial genetic structure  
 723 observed across Europe, and coalescent-based simulation combined with ABC-RF. We also  
 724 found that *D. plantaginea* rarely hosts endosymbiotic bacteria other than their primary  
 725 symbiont, *Buchnera aphidicola*. Our results provide further understanding of the evolutionary  
 726 processes at play during pest range expansion. We discussed the impacts of our results for  
 727 pest control programs.

728

## 729 **Colonization of apple trees by the rosy apple aphid is recent, and did not involve drastic** 730 **bottlenecks**

731 After removing clones from our analyses, we detected five main populations of the rosy apple  
 732 aphid: three in Europe, one in Morocco and one in the USA. The genetic diversity for each  
 733 population was within the same range as other aphid species such as *B. helichrysi* (Popkin et  
 734 al., 2017), *Eriosoma lanigerum* (Zhou et al., 2015) and *M. persicae nicotianae*  
 735 (Zepeda-Paulo et al., 2010). Our findings support that one round of sexual reproduction per  
 736 year in *D. plantaginea* is sufficient to generate genetic diversity. However, genetic diversity  
 737 (private alleles and allelic richness) in *D. plantaginea* was higher in Europe, but lower in the  
 738 USA and Morocco. More generally, patterns of genetic structure and diversity suggest

different demographic histories for the European, Moroccan and American populations of *D. plantaginea*.

Individuals from the European populations had partial membership to the multiple clusters, with similar membership coefficients for most individuals. This pattern of high admixture along a spatial transect might reflect a continuous gradation in allele frequencies (*i.e.*, a cline) across regions that cannot be detected by the methods used in this study. Indeed, a major limitation of all clustering approaches is the risk of inferring artefactual discrete groups in populations where genetic diversity is distributed continuously. DAPC and STRUCTURE are not immune to this bias and may erroneously identify clusters within a cline (Jombart et al., 2010). TESS is more sensitive to allelic gradient; this program includes a decay of the correlation between membership coefficients and distance within clusters (Chen et al., 2007). In the presence of clines and with evenly distributed sampling, TESS may detect fewer clusters than STRUCTURE (Durand, Chen, & François, 2009). The larger admixed clusters found with DAPC and STRUCTURE may therefore reflect a cline of allele frequency across Europe for the rosy apple aphid. Allele frequency clines can result from admixture between genetically distinct populations (Currat & Excoffier, 2005; Menozzi, Piazza, & Cavalli-Sforza, 1978) and/or from subsequent founder events during range expansion (Barbujani, Sokal, and Oden 1995; Fix 1997; Currat and Excoffier 2005). Genetic diversity is also expected to decrease along the expanding range (François, Blum, Jakobsson, & Rosenberg, 2008; Prugnolle, Manica, & Balloux, 2005). Founder events associated with a recent range expansion may have resulted in the decreasing east-west gradient of genetic diversity and the large number of admixed individuals observed in Europe. It is therefore possible that the European populations of the rosy apple aphid underwent a recent expansion. Note that we did not detect any signature of range expansion with the three-markers dataset (*COI*, *cytB* and *trpB*). This lack of signature of range expansion may be due to limited

number of samples used in our test (at least for the Moroccan and American populations), but also that the range expansion is so recent that we cannot catch its footprint with our sequence markers. Several preliminary ABC-RF tests of range expansion of the rosy apple aphid in Europe that failed (*i.e.*, very low posterior probabilities and prior error rates, data not shown) suggest that the second hypothesis is possible.

The Moroccan and North American populations displayed a different pattern of population differentiation and diversity compared with the European populations, suggesting an even more recent colonization history. The two populations were well circumscribed, and had the highest level of genetic differentiation from the European populations, the lowest genetic diversity and the lowest number of private alleles. In the TESS analysis, the American samples did not cluster separately from the European samples, and in the DAPC analysis, samples from America and Western Europe clustered together, suggesting that the American population originated recently from Europe. This is in agreement with the earliest record of *D. plantaginea* in the Eastern US dating back to 1890 (Footitt et al., 2006). Since then, there have probably been multiple introductions into the USA that prevented genetic differentiation from Europe. Similar scenarios have been described for the tobacco aphid, which was introduced into America from different European pools (Zepeda-Paulo et al., 2010), and the leaf-curl plum aphid *B. helichrysi* (Piffaretti et al., 2013) for which population genetic tools showed very little differentiation between European and North American populations. As for the Moroccan population, we lacked the power to infer its origin with the ABC-RF method. However, the significantly lower genetic diversity and number of private alleles in this population compared with that of Europe, the high level of admixture and the close genetic relationship with the Spanish population, suggest that the Moroccan population resulted from a recent colonization event from Southern Europe. Nevertheless, the history of the rosy apple aphid in North Africa deserves further investigation requiring additional

sampling in this region. Altogether, the significantly lower genetic diversity observed in the Moroccan and American populations suggest that these originated recently through relaxed founder events. Indeed, we did not find any evidence that these two populations underwent a recent strong bottleneck despite having significantly lower diversity in both SSR and sequence markers. Thus, the founder effect underlying the colonization of North America and Morocco may involve genetic drift in small populations rather than severe bottlenecks at the introduction event. Genetic diversity was also found to be higher in native populations within their native range in the tobacco aphid (Zepeda-Paulo et al., 2010) and the Russian wheat aphid (Zhou et al., 2015).

Altogether, a recent range expansion of the rosy apple aphid on its cultivated apple host is a plausible explanation of the observed spatial genetic structure and diversity. Rapid range expansion has also been described in the Russian wheat aphid (Zhang et al., 2014). Unfortunately, the ABC-RF method was not powerful enough to disentangle the different scenarios of colonization of the rosy apple aphid. The difficulty in elucidating the recent colonization history of the rosy apple aphid using ABC is likely due to the weak genetic differentiation among populations and to the occurrence of gene flow. However, the ABC-RF method was powerful enough to identify the occurrence of gene flow within and outside Europe.

### **Colonization with gene flow, likely driven by humans**

We found that the expansion of the rosy apple aphid involved several populations with high genetic diversity each, and inter- and intra- population gene flow across Europe, North America and Morocco. ABC-RF analyses strongly support scenarios with bidirectional gene flow among populations. The *Sp* parameter estimated within each population revealed large extent of historical gene flow within population. We used the *Sp* parameter estimates to compare the dispersal capacities of *D. plantaginea* with existing estimates in plants

(Vekemans & Hardy, 2004). The rosy apple aphid showed dispersal capacities equivalent to or even higher than that of wind-dispersed trees. The rosy apple aphid can therefore spread over kilometers, as suggested previously (Guillemaud et al., 2011), and as largely recognized in aphids (Loxdale et al., 1993). However, despite its high dispersal capacities and the large amount of gene flow among and within populations, we can still observe a weak, but significant, spatial genetic structure across its distribution. This subtle observed spatial genetic structure may be associated with human agricultural practices. The interchange of apple materials (*i.e.*, cultivars in form of scions and/or trees) is nowadays and, probably has been historically, frequent and a potential way of moving the rosy apple aphid in form of overwintering eggs among regions where apple is cultivated. This hypothesis agrees with a differentiated population observed in Asturias (Northwestern Spain). In this region, apple production is mainly used for cider-making and is based on local cider cultivars (Tardío, Arnal, & Lázaro, 2020). Since most of our samples from Spain are from Asturias, except the Catalan samples that were clustering with the European ones, the exchange of apple material within Asturias, and within other regions in Europe, may have been more intense, implying higher risk of aphid movement within regions than between regions. Of course, this is not the only explanation of the spatial genetic structure observed, physical barriers could also explain the higher genetic differentiation of the Moroccan and American populations.

#### **Putative center(s) of origin of the rosy apple aphid**

The geographical origin of *D. plantaginea* remains unresolved. Our phylogenetic analyses confirmed previous relationships between the rosy apple aphid and other aphids (Bašilova & Rakauskas, 2012; Rebijith et al., 2017). However, estimates of the divergence time of *D. plantaginea* from closely related species is now required, with denser sampling of the *Dysaphis* genus across several regions in Eurasia and molecular dating analyses.

Genetic diversity estimates from SSR markers yet suggest that the source population came from Eastern Europe, but it may also originate even further east in Central Asia where its fruit tree host was originally domesticated (Cornille et al., 2014; Harris et al., 2002). Our fail to collect *D. plantaginea* samples in this area, despite our attempts in China and Kazakhstan, prevents us from testing this scenario. However note that while *D. plantaginea* has been recorded in Central Asia according to several faunistic surveys (Kadyrbekov, 2002), it is hard to find in these regions. Furthermore, a lack of records of this species in the Global Biodiversity Information Facility (GBIF, 2020) also casts doubt as to whether *D. plantaginea* is common in this area.

Alternatively, *D. plantaginea* may have originated in the Caucasus or Asia Minor, maybe through a host jump from *Pyrus* to *Malus*. *Dysaphis plantaginea*, *Dysaphis radicola*, *Dysaphis devectora*, *Dysaphis brancoi*, *Dysaphis anthrisci*, *Dysaphis chaerophylli* are *Dysaphis* species reported to feed on the cultivated apple *M. domestica* as its primary host (Blommers et al., 2004; Stekolshchikov, 2006), but many aphid species also feed on pears including, *Dysaphis reaumuri* Mordvilko and *Dysaphis pyri* Boyer de Fonscolombe is *Pyrus* L. (Barbagallo, Cocuzza, Cravedi, & Komazaki, 2007). The *Pyrus* genus is known to have diverged a long time ago from the genus *Malus* probably in the Caucasus (Celton et al., 2009; Xiang et al., 2017). Therefore, the ancestral group from which *D. plantaginea* diverged might have had a *Pyrus* species as host. Analysis of samples from these regions is required to test this hypothesis.

#### **Low endosymbiont bacterial diversity associated with *D. plantaginea***

Our results showed that bacterial diversity was strikingly low in *D. plantaginea* across Europe, North America and Morocco. As expected, *B. aphidicola* was the predominant bacterial species (97% of our reads). However, at least nine secondary endosymbionts have

been reported among aphid species (reviewed in Zytynska & Weisser, 2016), including *Arsenophonus* Gherma, *Hamiltonella defensa* Moran, *Regiella insecticola*, *Rickettsia* Da Rocha-Lima, *Rickettsiella* Drobne, *Serratia symbiotica*, *Spiroplasma* Saglio and *Wolbachia* Hertig & Wolbach, and *Fukatsuia*. Here, we detected the presence of other bacteria only in a few samples. A *Serratia* sp. was the only secondary symbiont identified and it was found in only eight samples of *D. plantaginea*, collected on *Pyrus communis* in Iran, and in France and Spain on *M. domestica*. A *Regiella* sp. was found in three samples from another aphid species, *M. pyraia* collected on *M. domestica*. At least seven endosymbionts (*H. defensa*, *R. insecticola*, *Rickettsia* sp., *Rickettsiella* sp., *S. symbiotica*, *Spiroplasma* sp. and *Wolbachia* sp.) have been reported across a narrower spatial distribution in the model species *Acyrtosiphon pisum* and several other well-studied aphid species (Zytynska & Weisser, 2016). By contrast, another study (Henry, Maiden, Ferrari, & Godfray, 2015) found that neither *D. plantaginea* nor other *Dysaphis* species hosted any secondary symbionts, although it relied on a small number of individuals. This lack of endosymbiont bacterial diversity in *D. plantaginea* shows that its likely fast expansion is not the result of an association with different mutualistic endosymbionts.

## Concluding remarks

This study demonstrated that the colonization of a major fruit tree aphid pest occurred without strong bottleneck, maintaining high genetic diversity, and generated differentiated populations exchanging gene flow, with an isolation by distance pattern. The high level of within- and between- populations gene flow for the rosy apple aphid suggest that pesticide-resistant genotypes or genotypes circumventing plant resistance may invade large areas very rapidly after its emergence. Yet, the evidence of three differentiated populations in Europe, possibly resulting from human-mediated scion exchanges impacting gene flow within and

between populations, suggest that such a spread of resistant genotypes may be contained. Besides, the evidence for no long-term demographic changes in the populations of *D. plantaginea* in Europe, except for the Belgian populations, indicates that seasonal selective pressures, such as insecticide application, have little impact on the genetic diversity of the species. These results have implications in control and management of *D. plantaginea*, but further studies are needed to fully understand how selective pressures have impacted *D. plantaginea* adaptation. Finally, the origin of the rosy apple aphid is still unknown. Our results suggest it may have originated in Eastern Europe, the Caucasus or Asia Minor. However, the domestication of apple in this region remains unknown (Cornille et al., 2019, 2014; Spengler, 2019). Further investigations on the history of apple domestication and additional sampling of *D. plantaginea* in the Caucasus or Asia Minor, as well as sampling related aphid species, are required to better understand the origin of this major fruit tree pest.

### Acknowledgments

This research was funded by the laboratoire d'Excellence Biodiversity Agrosystem Society and Climate BASC (grant « Emergence POMPUCEDOM ») and Systematic Research funding, ATIP-Avenir program and the Institut Diversité Ecologie et Evolution du Vivant (IDEEV). AR and TU were supported by a grant of the Romanian Ministry of Education and Research, CCCDI - UEFISCDI, project number 384 PED-PN-III-P2-2.1-PED-2019-4924. We thank the Plateforme de Génomique GENTYANE INRAE UMR 1095 for assistance in genotyping, and especially the platform leader Charles Poncet. We thank the informatics team at the GQE-Le Moulon, in particular Adrien Falce, Benoit Johannet and Olivier Langella. We are grateful to the INRAE MIGALE bioinformatics facility (MIGALE, INRAE, 2020. Migale bioinformatics Facility, doi: 10.15454/1.5572390655343293E12) for providing help and/or computing and/or storage resources.

915

916 Authors contributions. AC, EJ, PD, LJ conceived and designed the experiments; AC, EJ, PD,  
 917 LJ, MH, TG obtained funding; AC, AR, AA, TB, GA, FP, AH, SKJ, RA, SS, LS, EG, LT,  
 918 FG, KM, YK, ARom, TD, IZ, OS, RJM, AA, BEH, EJ, HZ, IB, MR, HT, CM, BB, AD  
 919 sampled the material; AR, CR, AV, OG, MA, LM, ML, LB, SGOV performed the molecular  
 920 work; SGOV, AC, OG, MG, LB, EJ, GD analyzed the data. All co-authors discussed the  
 921 results. The manuscript was written by SGOV, AC, EJ, OG with critical inputs from other co-  
 922 authors.

923

924

925

926

927

## Figures and Tables

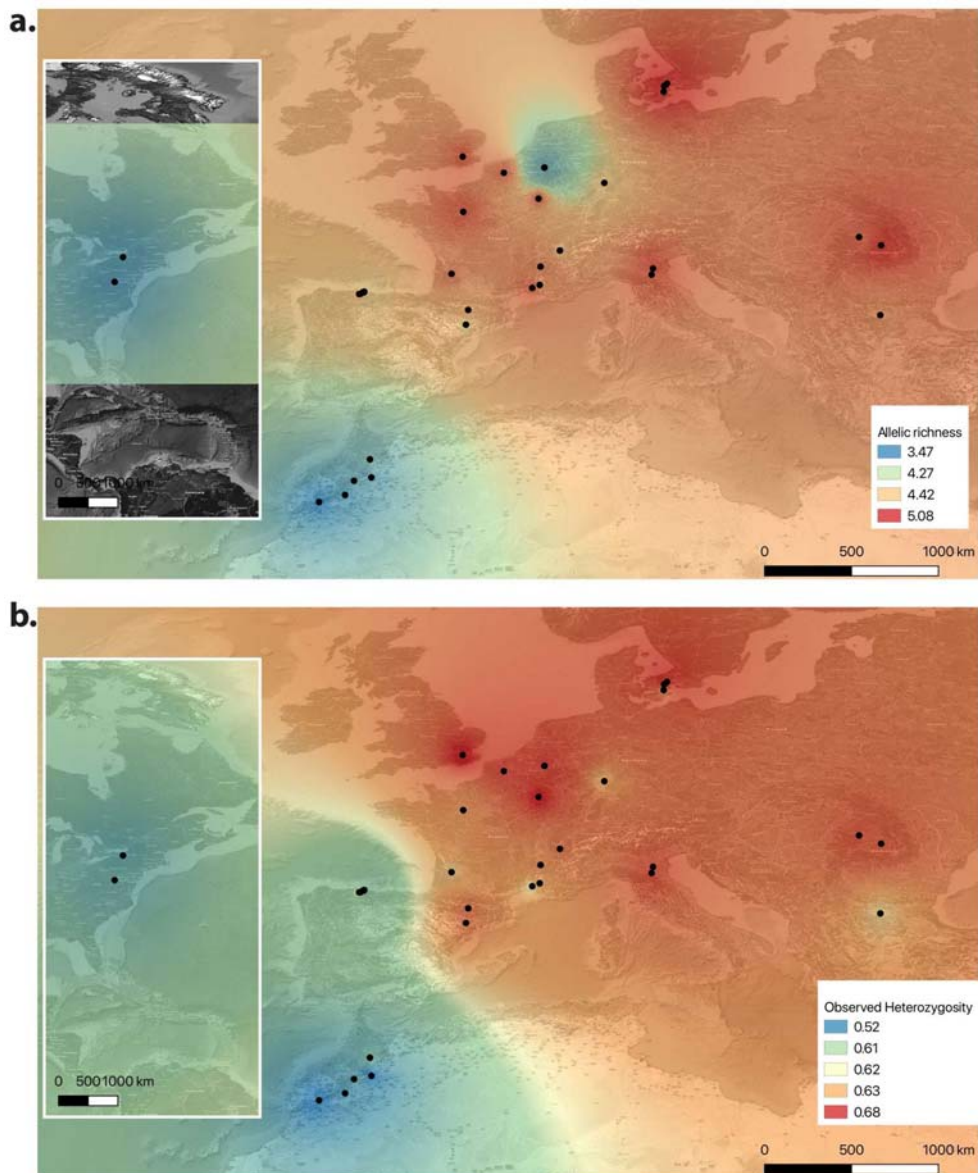

**Figure 1. Spatial genetic diversity of *Dysaphis plantaginea* in Europe, Morocco and North America ( $N = 582$ , clones were excluded, 52 sites, 30 SSR markers). a. Map of allelic richness per site. b. Map of observed heterozygosity. Sites with a sample size below five individuals are not represented on this map. Each dot is a site (*i.e.*, orchard). Red means high allelic richness, blue means low.**

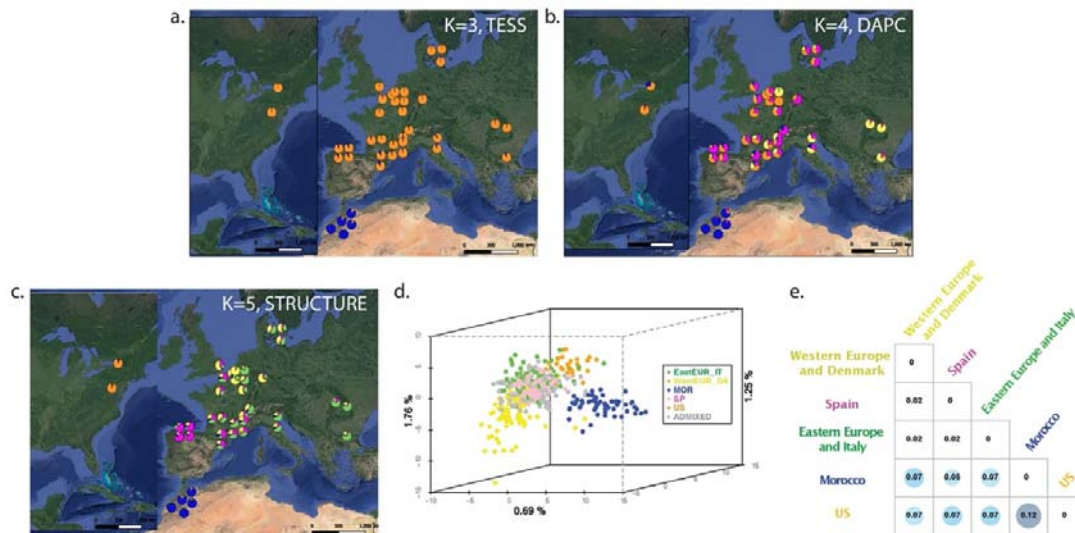

**Figure 2. Spatial population structure and differentiation of the rosy apple aphid *Dysaphis plantaginea* in Europe, Morocco and North America ( $N = 582$  individuals, 52 sites, 30 SSR markers).** Spatial population structure inferred with **a.** TESS ( $K = 3$ ), **b.** Discriminant Analysis of Principal Components ( $K = 4$ ), **c.** with STRUCTURE ( $K = 5$ ). Each figure includes i) a map with each pie chart representing the mean membership coefficients for each site, and, ii) a barplot including each individual represented by a vertical bar partitioned into  $K$  segments representing the proportion of ancestry of its genome from those  $K$  clusters. **d.** Principal component analysis including the 582 individuals; each individual is colored according to its membership  $> 0.625$  to one of the five *Dysaphis plantaginea* populations detected with STRUCTURE (individuals with a membership coefficient  $< 62.5\%$  to a given cluster is referred as “admixed”). **e.** Genetic differentiation ( $F_{ST}$ ) estimates among the five populations detected with STRUCTURE. US: United States of America; MA: Morocco; BG: Bulgaria; IT: Italy; RO: Romania; SP: Spain; FR: France; DE: Germany; BE: Belgium; UK: United Kingdom; DK: Denmark.

**Table 1. Summary statistics obtained for the five *Dysaphis plantaginea* populations (i.e., cluster including individuals with a membership coefficient > 62.5% to a given cluster) inferred with STRUCTURE ( $K = 5$ ), based on 30 SSR markers and three concatenated genes (*COI*, *Cytb* and *TrpB*), 67 *D. plantaginea* individuals), respectively (left and the right sections of the table).**

| Population                   | $N$ | $H_O$ | $H_E$ | $F_{IS}$    | $A_R$<br>( $N=28$ ) | $A_P$<br>( $N=28$ ) | $Sp$                  | $Nseq$ | $NH$ | $HD$ | $S$ | $\pi$  | $\theta$ | Tajima's<br>$D$       | Fu's $F_s$           |
|------------------------------|-----|-------|-------|-------------|---------------------|---------------------|-----------------------|--------|------|------|-----|--------|----------|-----------------------|----------------------|
| Eastern European and Italian | 114 | 0.68  | 0.77  | 0.12<br>*** | 7.77                | 1.65                | 0.0006 <sup>n.s</sup> | 34     | 6    | 0.59 | 6   | 0.0005 | 0.0008   | -0.960 <sup>n.s</sup> | 0.550 <sup>n.s</sup> |
| Western European and Danish  | 89  | 0.65  | 0.74  | 0.12<br>*** | 7.26                | 1.17                | 0.0019                | 10     | 4    | 0.67 | 3   | 0.0006 | 0.0005   | 0.120 <sup>n.s</sup>  | 0.880 <sup>n.s</sup> |
| Spanish                      | 113 | 0.61  | 0.71  | 0.14<br>*** | 6.80                | 0.92                | 0.0003                | 19     | 5    | 0.71 | 4   | 0.0006 | 0.0006   | -0.001 <sup>n.s</sup> | 0.842 <sup>n.s</sup> |
| Moroccan                     | 63  | 0.53  | 0.61  | 0.13<br>*** | 5.42                | 0.60                | -0.0038               | 2      | 2    | 0.67 | 1   | 0.0004 | 0.0003   | 1.630 <sup>n.s</sup>  | 1.280 <sup>n.s</sup> |
| American                     | 28  | 0.57  | 0.64  | 0.10<br>*** | 4.70                | 0.42                | -                     | 2      | 2    | 0    | 0   | 0      | 0        | 0                     | 0                    |

$N$ : number of individuals,  $H_O$  and  $H_E$ : observed and expected heterozygosity,  $F_{IS}$ : inbreeding coefficient, \*\*\*  $P$ -value < 0.0001,  $A_R$  and  $A_P$ : allelic richness and private allelic richness, respectively, corrected by the rarefaction method, estimated for a sample size of 28;  $Sp$  = spatial parameter; the number of individuals from different geographic locations is too low in the American population to compute the  $Sp$  parameter. Distribution of haplotypes and molecular diversity based on the sequence markers *COI*, *CytB* and *TrpB* from 67 individuals from different populations based on the genetic structure inferred with STRUCTURE.  $Nseq$  = Number of sequences;  $NH$ : number of haplotypes;  $HD$ : haplotype diversity;  $S$ = number of polymorphic sites;  $\pi$  = Nei's nucleotide diversity index;  $\theta$  = Watterson's diversity index  $\theta$ ; n.s. = not significant.

## References

- Aketarawong, N., Guglielmino, C. R., Karam, N., Falchetto, M., Manni, M., Scolari, F., ...  
Malacrida, A. R. (2014). The oriental fruitfly *Bactrocera dorsalis* ss in East Asia:  
Disentangling the different forces promoting the invasion and shaping the genetic  
make-up of populations. *Genetica*, 142(3), 201–213.
- Altschul, S. F., Gish, W., Miller, W., Myers, E. W., & Lipman, D. J. (1990). Basic local  
alignment search tool. *Journal of Molecular Biology*, 215(3), 403–410.
- Angert, A. L., Bontrager, M. G., & Ågren, J. (2020). What Do We Really Know About  
Adaptation at Range Edges? *Annual Review of Ecology, Evolution, and Systematics*,  
51(1), 341–361. doi: 10.1146/annurev-ecolsys-012120-091002
- Aslan, B., & Karaca, İ. (2005). Fruit tree Aphids and their natural enemies in Isparta  
region, Turkey. *Journal of Pest Science*, 78(4), 227–229. doi: 10.1007/s10340-005-  
0097-2
- Austerlitz, F., Jung-Muller, B., Godelle, B., & Gouyon, P.-H. (1997). Evolution of  
coalescence times, genetic diversity and structure during colonization. *Theoretical  
Population Biology*, 51(2), 148–164.
- Barbagallo, S., Cocuzza, G., Cravedi, P., & Komazaki, S. (2007). 29 IPM Case Studies:  
Deciduous Fruit Trees. *Aphids as Crop Pests*, 651.
- Bašilova, J., & Rakauskas, R. (2012). Phylogenetic relationships of *Dysaphis pyri* (BOYER  
DE FONSCOLOMBE) and *Dysaphis reaumuri* (MORDVILKO)(Hemiptera,  
Sternorrhyncha: Aphididae): COI and EF-1 $\alpha$  evidence. *Organisms Diversity &  
Evolution*, 12(2), 197–204.
- Bertorelle, G., Benazzo, A., & Mona, S. (2010). ABC as a flexible framework to estimate  
demography over space and time: Some cons, many pros. *Molecular Ecology*, 19(13),  
2609–2625.

- Blackman, R. L., & Eastop, V. F. (2000). *Aphids on the world's crops: An identification and information guide*. John Wiley & Sons Ltd.
- Blakeslee, A. M. H., Haram, L. E., Altman, I., Kennedy, K., Ruiz, G. M., & Miller, A. W. (2019). Founder effects and species introductions: A host versus parasite perspective. *Evolutionary Applications*, 13(3), 559–574. PubMed (32431736). doi: 10.1111/eva.12868
- Blommers, L. H. M., Helsen, H. H. M., & Vaal, F. W. N. M. (2004). Life history data of the rosy apple aphid *Dysaphis plantaginea* (Pass.) (Homopt., Aphididae) on plantain and as migrant to apple. *Journal of Pest Science*, 77(3), 155–163. doi: 10.1007/s10340-004-0046-5
- Bloomquist, E. W., Lemey, P., & Suchard, M. A. (2010). Three roads diverged? Routes to phylogeographic inference. *Trends in Ecology & Evolution*, 25(11), 626–632. doi: <https://doi.org/10.1016/j.tree.2010.08.010>
- Bonnemaison, L. (1959). Le puceron cendré du pommier (*Dysaphis plantaginea* Pass.). Morphologie et biologie. Méthodes de lutte. *Annales Des Épiphyties*, (3), 257–320.
- Brady, C. M., Asplen, M. K., Desneux, N., Heimpel, G. E., Hopper, K. R., Linnen, C. R., ... White, J. A. (2014). Worldwide populations of the aphid *Aphis craccivora* are infected with diverse facultative bacterial symbionts. *Microbial Ecology*, 67(1), 195–204.
- Breiman, L. (2001). Random Forests. *Machine Learning*, 45(1), 5–32. doi: 10.1023/A:1010933404324
- Buchner, P. (1965). Endosymbiosis of Animals with Plant Microorganisms. In H. Malke (Ed.), *Zeitschrift für allgemeine Mikrobiologie* (Vol. 7, pp. 168–168). ohn Wiley & Sons, Inc.: Interscience Publ. Retrieved from <https://onlinelibrary.wiley.com/doi/abs/10.1002/jobm.19670070219>

- CAB International. (2020). *Dysaphis plantaginea*. [Distribution map]. Nosworthy Way, Wallingford, Oxfordshire, OX10 8DE, UK.: CAB International Wallingford UK.
- Retrieved from <https://www.cabi.org/isc/abstract/20056600429>
- Celton, J. M., Chagne, D., Tustin, S. D., Terakami, S., Nishitani, C., Yamamoto, T., & Gardiner, S. E. (2009). Update on comparative genome mapping between *Malus* and *Pyrus*. *BMC Res Notes*, 2. doi: 10.1186/1756-0500-2-182
- Chapuis, M.-P., Raynal, L., Plantamp, C., Meynard, C. N., Blondin, L., Marin, J.-M., & Estoup, A. (2020). A young age of subspecific divergence in the desert locust inferred by ABC random forest. *Molecular Ecology*, 1–17. doi: 10.1111/mec.15663
- Chen, C., Durand, E., Forbes, F., & François, O. (2007). Bayesian clustering algorithms ascertaining spatial population structure: A new computer program and a comparison study. *Molecular Ecology Notes*, 7(5), 747–756.
- Choi, H., Shin, S., Jung, S., Clarke, D. J., & Lee, S. (2018). Molecular phylogeny of Macrosiphini (Hemiptera: Aphididae): An evolutionary hypothesis for the Pterocomma-group habitat adaptation. *Molecular Phylogenetics and Evolution*, 121, 12–22. doi: 10.1016/j.ympev.2017.12.021
- Coeur d’acier, A., Cruaud, A., Artige, E., Genson, G., Clamens, A.-L., Pierre, E., ... Rasplus, J.-Y. (2014). DNA Barcoding and the Associated PhylAphidB@se Website for the Identification of European Aphids (Insecta: Hemiptera: Aphididae). *PLOS ONE*, 9(6), 1–16. doi: 10.1371/journal.pone.0097620
- Cornille, A., Antolín, F., Garcia, E., Vernesi, C., Fietta, A., Brinkkemper, O., ... Roldán-Ruiz, I. (2019). A Multifaceted Overview of Apple Tree Domestication. *Trends in Plant Science*, 24(8), 770–782. doi: <https://doi.org/10.1016/j.tplants.2019.05.007>
- Cornille, A., Feurtey, A., Gélín, U., Ropars, J., Misvanderbrugge, K., Gladieux, P., & Giraud, T. (2015). Anthropogenic and natural drivers of gene flow in a temperate wild fruit

- tree: A basis for conservation and breeding programs in apples. *Evolutionary Applications*, n/a-n/a. doi: 10.1111/eva.12250
- Cornille, A., Giraud, T., Smulders, M. J. M., Roldán-Ruiz, I., & Gladieux, P. (2014). The domestication and evolutionary ecology of apples. *Trends in Genetics*, 30(2), 57–65. doi: 10.1016/j.tig.2013.10.002
- Cornuet, J. M., & Luikart, G. (1996). Description and power analysis of two tests for detecting recent population bottlenecks from allele frequency data. *Genetics*, 144(4), 2001–2014.
- Csillery, K., Blum, M., & Francois, O. (2012). *Tools for Approximate Bayesian Computation (ABC)* <http://cran.r-project.org/web/packages/abc/index.html>.
- Csilléry, K., Blum, M. G. B., Gaggiotti, O. E., & François, O. (2010). Approximate Bayesian computation (ABC) in practice. *Trends in Ecology & Evolution*, 25(7), 410–418.
- Curat, M., & Excoffier, L. (2005). The effect of the Neolithic expansion on European molecular diversity. *Proceedings of the Royal Society B: Biological Sciences*, 272(1564), 679–688. doi: 10.1098/rspb.2004.2999
- Dray, S., & Dufour, A.-B. (2007). The ade4 Package: Implementing the Duality Diagram for Ecologists. *Journal of Statistical Software; Vol 1, Issue 4 (2007)*. doi: 10.18637/jss.v022.i04
- Durand, E., Chen, C., & François, O. (2009). *Tess version 2.3—Reference Manual August 2009*. 30.
- Egea, R., Casillas, S., & Barbadilla, A. (2008). Standard and generalized McDonald-Kreitman test: A website to detect selection by comparing different classes of DNA sites. *Nucleic Acids Research*, 36(Web Server), W157–W162. doi: 10.1093/nar/gkn337

- Escudié, F., Auer, L., Bernard, M., Mariadassou, M., Cauquil, L., Vidal, K., ... Pascal, G. (2018). FROGS: Find, Rapidly, OTUs with Galaxy Solution. *Bioinformatics*, 34(8), 1287–1294. doi: 10.1093/bioinformatics/btx791
- Estoup, A. A., Raynal, L., Verdu, P., & Marin, J.-M. (2018). Model choice using Approximate Bayesian Computation and Random Forests: Analyses based on model grouping to make inferences about the genetic history of Pygmy human populations. *Journal de La Societe Française de Statistique*, 159(3), 167–190.
- Estoup, A., & Guillemaud, T. (2010). Reconstructing routes of invasion using genetic data: Why, how and so what? *Molecular Ecology*, 19(19), 4113–4130. doi: 10.1111/j.1365-294X.2010.04773.x
- Evanno, G., Regnaut, S., & Goudet, J. (2005). Detecting the number of clusters of individuals using the software STRUCTURE: a simulation study. *Molecular Ecology*, 14(8), 2611–2620.
- Excoffier, L., & Foll, M. (2011). fastsimcoal: A continuous-time coalescent simulator of genomic diversity under arbitrarily complex evolutionary scenarios. *Bioinformatics*, 27(9), 1332–1334. doi: 10.1093/bioinformatics/btr124
- Excoffier, L., Foll, M., & Petit, R. J. (2009). Genetic consequences of range expansions. *Annual Review of Ecology, Evolution, and Systematics*, 40(1), 481–501. doi: 10.1146/annurev.ecolsys.39.110707.173414
- Excoffier, L., & Lischer, H. E. L. (2010). Arlequin suite ver 3.5: A new series of programs to perform population genetics analyses under Linux and Windows. *Molecular Ecology Resources*, 10(3), 564–567. doi: 10.1111/j.1755-0998.2010.02847.x
- Fang, F., Chen, J., Jiang, L., Qu, Y., & Qiao, G. (2018). Genetic origin and dispersal of the invasive soybean aphid inferred from population genetic analysis and approximate

- Bayesian computation. *Integrative Zoology*, 13(5), 536–552. doi: 10.1111/1749-4877.12307
- Fontaine, M., Labbé, F., Dussert, Y., Delière, L., Richart-Cervera, S., Giraud, T. E., & Delmotte, F. (2020). *Europe as a bridgehead in the worldwide invasion history of grapevine downy mildew, Plasmopara viticola*. doi: 10.1101/2020.09.22.307678
- Footitt, R. G., Halbert, S. E., Miller, G. L., Maw, E., & Russell, L. M. (2006). *Adventive aphids (Hemiptera: Aphididae) of America north of Mexico*. Retrieved from <https://pubag.nal.usda.gov/catalog/8716>
- Frago, E., Mala, M., Weldegergis, B. T., Yang, C., McLean, A., Godfray, H. C. J., ... Dicke, M. (2017). Symbionts protect aphids from parasitic wasps by attenuating herbivore-induced plant volatiles. *Nature Communications*, 8(1), 1860. doi: 10.1038/s41467-017-01935-0
- Frago, E., Zytynska, S. E., & Fatouros, N. E. (2020). Microbial symbionts of herbivorous species across the insect tree. *Mechanisms Underlying Microbial Symbiosis*, 111–159. doi: 10.1016/bs.aiip.2020.04.002
- Fraimout, A., Debat, V., Fellous, S., Hufbauer, R. A., Foucaud, J., Pudlo, P., ... Estoup, A. (2017). Deciphering the Routes of invasion of *Drosophila suzukii* by Means of ABC Random Forest. *Molecular Biology and Evolution*, 34(4), 980–996. PMC (PMC5400373). doi: 10.1093/molbev/msx050
- Francis, R. (2016). POPHELPER: An R package and web app to analyse and visualise population structure. *Molecular Ecology Resources*, 17, n/a-n/a. doi: 10.1111/1755-0998.12509
- François, O., Blum, M. G. B., Jakobsson, M., & Rosenberg, N. A. (2008). Demographic History of European Populations of *Arabidopsis thaliana*. *PLOS Genetics*, 4(5), e1000075. doi: 10.1371/journal.pgen.1000075

- Fu, Y.-X. (1997). Statistical Tests of Neutrality of Mutations Against Population Growth, Hitchhiking and Background Selection. *Genetics*, 147(2), 915.
- Garnas, J., R., Auger-Rozenberg, M.-A., Roques, A., Bertelsmeier, C., Wingfield, M. J., Saccaggi, D. L., ... Slippers, B. (2016). Complex patterns of global spread in invasive insects: Eco-evolutionary and management consequences. *Biological Invasions*, 18(4), 935–952. doi: 10.1007/s10530-016-1082-9
- Giordano, R., Donthu, R. K., Zimin, A. V., Julca Chavez, I. C., Gabaldon, T., van Munster, M., ... Zhan, S. (2020). Soybean aphid biotype 1 genome: Insights into the invasive biology and adaptive evolution of a major agricultural pest. *Insect Biochemistry and Molecular Biology*, 120, 103334. doi: 10.1016/j.ibmb.2020.103334
- Gladieux, P., Feurtey, A., Hood, M. E., Snirc, A., Clavel, J., Dutech, C., ... Giraud, T. (2015). The population biology of fungal invasions. *Molecular Ecology*, 24(9), 1969–1986. doi: 10.1111/mec.13028
- Gladieux, Pierre, Ropars, J., Badouin, H., Branca, A., Aguilera, G., de Vienne, D. M., ... Giraud, T. (2014). Fungal evolutionary genomics provides insight into the mechanisms of adaptive divergence in eukaryotes. *Molecular Ecology*, 23(4), 753–773. doi: 10.1111/mec.12631
- Guillemaud, T., Blin, A., Simon, S., Morel, K., & Franck, P. (2011). Weak Spatial and Temporal Population Genetic Structure in the Rosy Apple Aphid, *Dysaphis plantaginea*, in French Apple Orchards. *PLoS ONE*, 6(6), e21263. doi: 10.1371/journal.pone.0021263
- Hardy, O. J., & Vekemans, X. (2002). SPAGeDI: a versatile computer program to analyse spatial genetic structure at the individual or population levels. *Molecular Ecology Notes*, 2(4), 618–620.

- Harris, S. A., Robinson, J. P., & Juniper, B. E. (2002). Genetic clues to the origin of the apple. *Trends Genet*, 18(8), 426–430.
- Haynes, S., Darby, A. C., Daniell, T. J., Webster, G., van Veen, F. J. F., Godfray, H. C. J., ... Douglas, A. E. (2003). Diversity of Bacteria Associated with Natural Aphid Populations. *Applied and Environmental Microbiology*, 69(12), 7216–7223. doi: 10.1128/AEM.69.12.7216-7223.2003
- Henry, L. M., Maiden, M. C. J., Ferrari, J., & Godfray, H. C. J. (2015). Insect life history and the evolution of bacterial mutualism. *Ecology Letters*, 18(6), 516–525. doi: 10.1111/ele.12425
- Hickerson, M. J., Carstens, B. C., Cavender-Bares, J., Crandall, K. A., Graham, C. H., Johnson, J. B., ... Yoder, A. D. (2010). Phylogeography's past, present, and future: 10 years after. *Molecular Phylogenetics and Evolution*, 54(1), 291–301. doi: 10.1016/j.ympev.2009.09.016
- Hoffmann, B. D., & Courchamp, F. (2016). Biological invasions and natural colonisations: Are they that different? *NeoBiota*, 29, 1–14. doi: 10.3897/neobiota.29.6959
- Holman, J. (2009). *Host Plant Catalog of Aphids: Palaearctic Region* (Springer Nature eReference).
- Huelsenbeck, J. P., & Ronquist, F. (2001). MRBAYES: Bayesian inference of phylogenetic trees. *Bioinformatics*, 17(8), 754–755. doi: 10.1093/bioinformatics/17.8.754
- Jakobsson, M., & Rosenberg, N. A. (2007). CLUMPP: a cluster matching and permutation program for dealing with label switching and multimodality in analysis of population structure. *Bioinformatics*, 23(14), 1801–1806. doi: 10.1093/bioinformatics/btm233
- Jombart, T., & Collins, C. (2015). *A tutorial for Discriminant Analysis of Principal Components (DAPC) using adegenet 2.0.0*. 43.

- Jombart, T., Devillard, S., & Balloux, F. (2010). Discriminant analysis of principal components: A new method for the analysis of genetically structured populations. *BMC Genetics*, 11(1), 94. doi: 10.1186/1471-2156-11-94
- Jousselin, E., Clamens, A.-L., Galan, M., Bernard, M., Maman, S., Gschloessl, B., ... Coeur d'acier, A. (2016). Assessment of a 16S rRNA amplicon Illumina sequencing procedure for studying the microbiome of a symbiont-rich aphid genus. *Molecular Ecology Resources*, 16(3), 628–640. doi: 10.1111/1755-0998.12478
- Jousselin, Emmanuelle, Desdevises, Y., & Coeur d'acier, A. (2009). Fine-scale cospeciation between *Brachycaudus* and *Buchnera aphidicola*: Bacterial genome helps define species and evolutionary relationships in aphids. *Proceedings of the Royal Society B: Biological Sciences*, 276(1654), 187–196. doi: 10.1098/rspb.2008.0679
- Kadyrbekov, Rk. (2002). About the aphid fauna (Homoptera Aphididae) of West Tien-Shan (Kazakhstan part). *Tethys Entomological Research*, (4), 65–76.
- Kalinowski, S. T. (2011). The computer program STRUCTURE does not reliably identify the main genetic clusters within species: Simulations and implications for human population structure. *Heredity*, 106(4), 625–632.
- Kim, H., Hoelmer, K., & Lee, S. (2016). Population genetics of the soybean aphid in North America and East Asia: Test for introduction between native and introduced populations. *Biological Invasions*, 19. doi: 10.1007/s10530-016-1299-7
- Kirk, H., Dorn, S., & Mazzi, D. (2013). Molecular genetics and genomics generate new insights into invertebrate pest invasions. *Evolutionary Applications*, 6(5), 842–856. doi: 10.1111/eva.12071
- Kozich, J. J., Westcott, S. L., Baxter, N. T., Highlander, S. K., & Schloss, P. D. (2013). Development of a Dual-Index Sequencing Strategy and Curation Pipeline for Analyzing Amplicon Sequence Data on the MiSeq Illumina Sequencing Platform.

- Applied and Environmental Microbiology*, 79(17), 5112–5120. doi: 10.1128/AEM.01043-13
- Kumar, S., Stecher, G., & Tamura, K. (2016). MEGA7: Molecular Evolutionary Genetics Analysis Version 7.0 for Bigger Datasets. *Molecular Biology and Evolution*, 33(7), 1870–1874. doi: 10.1093/molbev/msw054
- Lawson Handley, L.-J., Estoup, A., Evans, D. M., Thomas, C. E., Lombaert, E., Facon, B., ... Roy, H. E. (2011). Ecological genetics of invasive alien species. *BioControl*, 56(4), 409–428. doi: 10.1007/s10526-011-9386-2
- Leclair, M., Pons, I., Mahéo, F., Morlière, S., Simon, J.-C., & Outreman, Y. (2016). Diversity in symbiont consortia in the pea aphid complex is associated with large phenotypic variation in the insect host. *Evolutionary Ecology*, 30(5), 925–941. doi: 10.1007/s10682-016-9856-1
- Lenhart, P. A., & White, J. A. (2020). Endosymbionts facilitate rapid evolution in a polyphagous herbivore. *Journal of Evolutionary Biology*, 33(10), 1507–1511. doi: 10.1111/jeb.13697
- Loiselle, B. A., Sork, V. L., Nason, J., & Graham, C. (1995). Spatial genetic structure of a tropical understory shrub, *Psychotria officinalis* (Rubiaceae). *American Journal of Botany*, 82(11), 1420–1425.
- Loxdale, H. D., Hardie, J., Halbert, S., Footitt, R., Kidd, N. A. C., & Carter, C. I. (1993). The relative importance of short- and long-range movement of flying aphids. *Biological Reviews*, 68(2), 291–311. doi: 10.1111/j.1469-185X.1993.tb00998.x
- Magoč, T., & Salzberg, S. L. (2011). FLASH: Fast length adjustment of short reads to improve genome assemblies. *Bioinformatics*, 27(21), 2957–2963. doi: 10.1093/bioinformatics/btr507

- Mahé, F., Rognes, T., Quince, C., Vargas, C. de, & Dunthorn, M. (2014). Swarm: Robust and fast clustering method for amplicon-based studies. *PeerJ*, 2, e593. doi: 10.7717/peerj.593
- Martin, M. (2011). Cutadapt removes adapter sequences from high-throughput sequencing reads. *EMBnet.Journal*, 17(1), 10–12. doi: 10.14806/ej.17.1.200
- McDonald, J. H., & Kreitman, M. (1991). Adaptive protein evolution at the Adh locus in *Drosophila*. *Nature*, 351(6328), 652–654. doi: 10.1038/351652a0
- Meirmans, P. G., & Van Tienderen, P. H. (2004). Genotype and genodive: Two programs for the analysis of genetic diversity of asexual organisms. *Mol Ecol Notes*, 4(4), 792–794.
- Menozi, P., Piazza, A., & Cavalli-Sforza, L. (1978). Synthetic maps of human gene frequencies in Europeans. *Science*, 201(4358), 786–792. doi: 10.1126/science.356262
- Mizrahi-Man, O., Davenport, E. R., & Gilad, Y. (2013). Taxonomic Classification of Bacterial 16S rRNA Genes Using Short Sequencing Reads: Evaluation of Effective Study Designs. *PLOS ONE*, 8(1), e53608. doi: 10.1371/journal.pone.0053608
- Morales-Hojas, R., Sun, J., Iraizoz, F. A., Tan, X., & Chen, J. (2020). Contrasting population structure and demographic history of cereal aphids in different environmental and agricultural landscapes. *Ecology and Evolution*, 10(18), 9647–9662. doi: 10.1002/ece3.6565
- Nei, M. (1987). *Molecular Evolutionary Genetics*. Columbia University Press. Retrieved from <https://books.google.es/books?id=UhRSsLkjdGc>
- Oliver, K. M., Degnan, P. H., Burke, G. R., & Moran, N. A. (2010). Facultative symbionts in aphids and the horizontal transfer of ecologically important traits. *Annu Rev Entomol*, 55. doi: 10.1146/annurev-ento-112408-085305
- Peccoud, J., Figueroa, C. C., Silva, A. X., Ramirez, C. C., Mieuze, L., Bonhomme, J., ... Simon, J.-C. (2008). Host range expansion of an introduced insect pest through

- multiple colonizations of specialized clones. *Molecular Ecology*, 17(21), 4608–4618.  
doi: 10.1111/j.1365-294X.2008.03949.x
- Piffaretti, J., Clamens, A.-L., Vanlerberghe, F., Masutti, F., Gupta, R. K., Call, E., Halbert, S., & Jousset, E. (2013). Regular or covert sex defines two lineages and worldwide superclones within the leaf-curl plum aphid (*Brachycaudus helichrysi*, Kaltenbach). *Molecular Ecology*, 22(15), 3916–3932. doi: 10.1111/mec.12371
- Piry, S., Luikart, G., & Cornuet, J. M. (1999). Computer note. BOTTLENECK: a computer program for detecting recent reductions in the effective size using allele frequency data. *Journal of Heredity*, 90(4), 502–503. doi: 10.1093/jhered/90.4.502
- Popkin, M., Piffaretti, J., Clamens, A.-L., Qiao, G.-X., Chen, J., Vitalis, R., ... Jousset, E. (2017). Large-scale phylogeographic study of the cosmopolitan aphid pest *Brachycaudus helichrysi* reveals host plant associated lineages that evolved in allopatry. *Biological Journal of the Linnean Society*, 120(1), 102–114. doi: 10.1111/bij.12869
- Posada, D., & Crandall, K. A. (2001). Intraspecific gene genealogies: Trees grafting into networks. *Trends in Ecology & Evolution*, 16(1), 37–45. doi: 10.1016/S0169-5347(00)00206-7
- Pritchard, J. K., Stephens, M., & Donnelly, P. (2000). Inference of population structure using multilocus genotype data. *Genetics*, 155(2), 945–959.
- Prugnolle, F., Manica, A., & Balloux, F. (2005). Geography predicts neutral genetic diversity of human populations. *Current Biology*, 15(5), R159–R160. doi: 10.1016/j.cub.2005.02.038
- Pudlo, P., Marin, J.-M., Estoup, A., Cornuet, J.-M., Gautier, M., & Robert, C. P. (2016). Reliable ABC model choice via random forests. *Bioinformatics*, 32(6), 859–866. doi: 10.1093/bioinformatics/btv684

- Puechmaille, S. J. (2016). The program structure does not reliably recover the correct population structure when sampling is uneven: Subsampling and new estimators alleviate the problem. *Molecular Ecology Resources*, 16(3), 608–627. doi: 10.1111/1755-0998.12512
- Raynal, L., Marin, J.-M., Pudlo, P., Ribatet, M., Robert, C. P., & Estoup, A. (2019). ABC random forests for Bayesian parameter inference. *Bioinformatics*, 35(10), 1720–1728. doi: 10.1093/bioinformatics/bty867
- Rebijith, K. B., Hande, R., Joshi, S., Surveswaran, S., Ramamurthy, V., & Kumar, N. (2017). Reconstructing the macroevolutionary patterns of aphids (Hemiptera: Aphididae) using nuclear and mitochondrial DNA sequences. *Biological Journal of the Linnean Society*. doi: 10.1093/biolinnean/blx020
- Ripley, B. D., & Ripley, B. D. (2001). The R project in statistical computing. *MSOR Connections*.
- Rispe, C., Legeai, F., Nabity, P. D., Fernández, R., Arora, A. K., Baa-Puyoulet, P., ... Tagu, D. (2020). The genome sequence of the grape phylloxera provides insights into the evolution, adaptation, and invasion routes of an iconic pest. *BMC Biology*, 18(1), 90. doi: 10.1186/s12915-020-00820-5
- Rius, M., & Darling, J. (2014). How important is intraspecific genetic admixture to the success of colonising populations? *Trends in Ecology & Evolution*, 29. doi: 10.1016/j.tree.2014.02.003
- Rognes, T., Flouri, T., Nichols, B., Quince, C., & Mahé, F. (2016). VSEARCH: A versatile open source tool for metagenomics. *PeerJ*, 4, e2584. doi: 10.7717/peerj.2584
- Rousset, F. (2008). Genepop'007: A complete re-implementation of the genepop software for Windows and Linux. *Molecular Ecology Resources*, 8(1), 103–106.

- Roux, C., & Pannell, J. R. (2015). Inferring the mode of origin of polyploid species from next-generation sequence data. *Molecular Ecology*, (24), 1047–1059. doi: 10.1111/mec.13078
- Rozas, J., Sánchez-DelBarrio, J. C., Messeguer, X., & Rozas, R. (2003). DnaSP, DNA polymorphism analyses by the coalescent and other methods. *Bioinformatics*, 19(18), 2496–2497. doi: 10.1093/bioinformatics/btg359
- Russell, J. A., Weldon, S., Smith, A. H., Kim, K. L., Hu, Y., Łukasik, P., ... Oliver, K. M. (2013). Uncovering symbiont-driven genetic diversity across North American pea aphids. *Molecular Ecology*, 22(7), 2045–2059. doi: 10.1111/mec.12211
- Simon, J.-C., Rispe, C., & Sunnucks, P. (2002). Ecology and evolution of sex in aphids. *Trends in Ecology & Evolution*, 17(1), 34–39. doi: 10.1016/S0169-5347(01)02331-X
- Simon, J.-C., Stoeckel, S., & Tagu, D. (2010). Evolutionary and functional insights into reproductive strategies of aphids. *Comptes Rendus Biologies*, 333(6), 488–496. doi: 10.1016/j.crv.2010.03.003
- Sow, A., Brévault, T., Benoit, L., Chapuis, M.-P., Galan, M., Coeur D’acier, A., ... Haran, J. (2019). Deciphering host-parasitoid interactions and parasitism rates of crop pests using DNA metabarcoding. *Scientific Reports*, 9(1), 3646. doi: 10.1038/s41598-019-40243-z
- Spengler, R. N. (2019). Origins of the Apple: The Role of Megafaunal Mutualism in the Domestication of Malus and Rosaceous Trees. *Frontiers in Plant Science*, 10. doi: 10.3389/fpls.2019.00617
- Stekolshchikov, A. V. (2006). Aphids of the genus Dysaphis Börner (Homoptera, Aphididae) living on plants of the family polygonaceae. *Entomological Review*, 86(7), 787–805. doi: 10.1134/S0013873806070049

- Stukenbrock, E. H. (2016). The Role of Hybridization in the Evolution and Emergence of New Fungal Plant Pathogens. *Phytopathology*, 106(2), 104–112. doi: 10.1094/PHYTO-08-15-0184-RVW
- Stukenbrock, E. H., & McDonald, B. A. (2008). The Origins of Plant Pathogens in Agro-Ecosystems. *Annual Review of Phytopathology*, 46(1), 75–100. doi: 10.1146/annurev.phyto.010708.154114
- Szpiech, Z. A., Jakobsson, M., & Rosenberg, N. A. (2008). ADZE: a rarefaction approach for counting alleles private to combinations of populations. *Bioinformatics*, 24(21), 2498–2504. doi: 10.1093/bioinformatics/btn478
- Tajima, F. (1989). Statistical method for testing the neutral mutation hypothesis by DNA polymorphism. *Genetics*, 123(3), 585–595.
- Tardío, J., Arnal, A., & Lázaro, A. (2020). Ethnobotany of the crab apple tree (*Malus sylvestris* (L.) Mill., Rosaceae) in Spain. *Genetic Resources and Crop Evolution*. doi: 10.1007/s10722-020-01026-y
- Tsuchida, T., Koga, R., Shibao, H., Matsumoto, T., & Fukatsu, T. (2002). Diversity and geographic distribution of secondary endosymbiotic bacteria in natural populations of the pea aphid, *Acyrtosiphon pisum*. *Molecular Ecology*, 11(10), 2123–2135. doi: 10.1046/j.1365-294X.2002.01606.x
- Turcotte, M. M., Araki, H., Karp, D. S., Poveda, K., & Whitehead, S. R. (2017). The eco-evolutionary impacts of domestication and agricultural practices on wild species. *Philosophical Transactions of the Royal Society of London B: Biological Sciences*, 372(1712). doi: 10.1098/rstb.2016.0033
- Vekemans, X., & Hardy, O. J. (2004). New insights from fine-scale spatial genetic structure analyses in plant populations. *Molecular Ecology*, 13(4), 921–935.

- Vorburger, C., Lancaster, M., & Sunnucks, P. (2003). Environmentally related patterns of reproductive modes in the aphid *Myzus persicae* and the predominance of two ‘superclones’ in Victoria, Australia. *Molecular Ecology*, 12(12), 3493–3504. doi: 10.1046/j.1365-294X.2003.01998.x
- Wang, Y., Hereward, J. P., & Zhang, G. (2016). High Spatial Genetic Structure and Genetic Diversity in Chinese Populations of *Sitobion miscanthi* (Hemiptera: Aphididae). *Journal of Economic Entomology*, 109(1), 375–384. doi: 10.1093/jee/tov294
- Warneys, R., Gaucher, M., Robert, P., Aligon, S., Anton, S., Aubourg, S., ... Degraeve, A. (2018). Acibenzolar-S-Methyl Reprograms Apple Transcriptome Toward Resistance to Rosy Apple Aphid. *Frontiers in Plant Science*, 9, 1795. doi: 10.3389/fpls.2018.01795
- Watterson, G. A. (1975). On the number of segregating sites in genetical models without recombination. *Theoretical Population Biology*, 7(2), 256–276.
- Watterson, G. A. (1978). The homozygosity test of neutrality. *Genetics*, 88(2), 405.
- Wegmann, D., Leuenberger, C., Neuenschwander, S., & Excoffier, L. (2010). ABCtoolbox: A versatile toolkit for approximate Bayesian computations. *BMC Bioinformatics*, 11(1), 116. doi: 10.1186/1471-2105-11-116
- Wei, G., Zuorui, S., Zhihong, L., & Lingwang, G. (2005). Migration and population genetics of the grain aphid *Macrosiphum miscanthi* (Takahashi) in relation to the geographic distance and gene flow. *Progress in Natural Science*, 15(11), 1000–1004. doi: 10.1080/10020070512331343176
- Wilkaniec, B. (1993). The influence of feeding of the rosy apple aphid, *Dysaphis plantaginea* (Pass.) (Homoptera: Aphididae) on the growth of apple fruits. *Roczniki Nauk Rolniczych. Seria E, Ochrona Roślin*, 23(1/2), 75–78.

- Xiang, Y., Huang, C.-H., Hu, Y., Wen, J., Li, S., Yi, T., ... Ma, H. (2017). Evolution of Rosaceae Fruit Types Based on Nuclear Phylogeny in the Context of Geological Times and Genome Duplication. *Molecular Biology and Evolution*, 34(2), 262–281. doi: 10.1093/molbev/msw242
- Zepeda-Paulo, F. A., Simon, J. C., Ramírez, C. C., Fuentes-Contreras, E., Margaritopoulos, J. T., Wilson, A. C. C., ... Figueroa, C. C. (2010). The invasion route for an insect pest species: The tobacco aphid in the New World. *Molecular Ecology*, 19(21), 4738–4752. doi: 10.1111/j.1365-294X.2010.04857.x
- Zepeda-Paulo, F., Ortiz-Martínez, S., Silva, A. X., & Lavandero, B. (2018). Low bacterial community diversity in two introduced aphid pests revealed with 16S rRNA amplicon sequencing. *PeerJ*, 6, e4725. doi: 10.7717/peerj.4725
- Zhang, B., Edwards, O., Kang, L., & Fuller, S. (2014). A multi-genome analysis approach enables tracking of the invasion of a single Russian wheat aphid (*Diuraphis noxia*) clone throughout the New World. *Mol Ecol*, 23. doi: 10.1111/mec.12714
- Zhou, H.-X., Zhang, R.-M., Tan, X.-M., Tao, Y.-L., Wan, F., Wu, Q., & Chu, D. (2015). Invasion Genetics of Woolly Apple Aphid (Hemiptera: Aphididae) in China. *Journal of Economic Entomology*, 108. doi: 10.1093/jee/tov074
- Zytynska, S. E., & Weisser, W. W. (2016). The natural occurrence of secondary bacterial symbionts in aphids. *Ecological Entomology*, 41(1), 13–26. doi: 10.1111/een.12281

a.

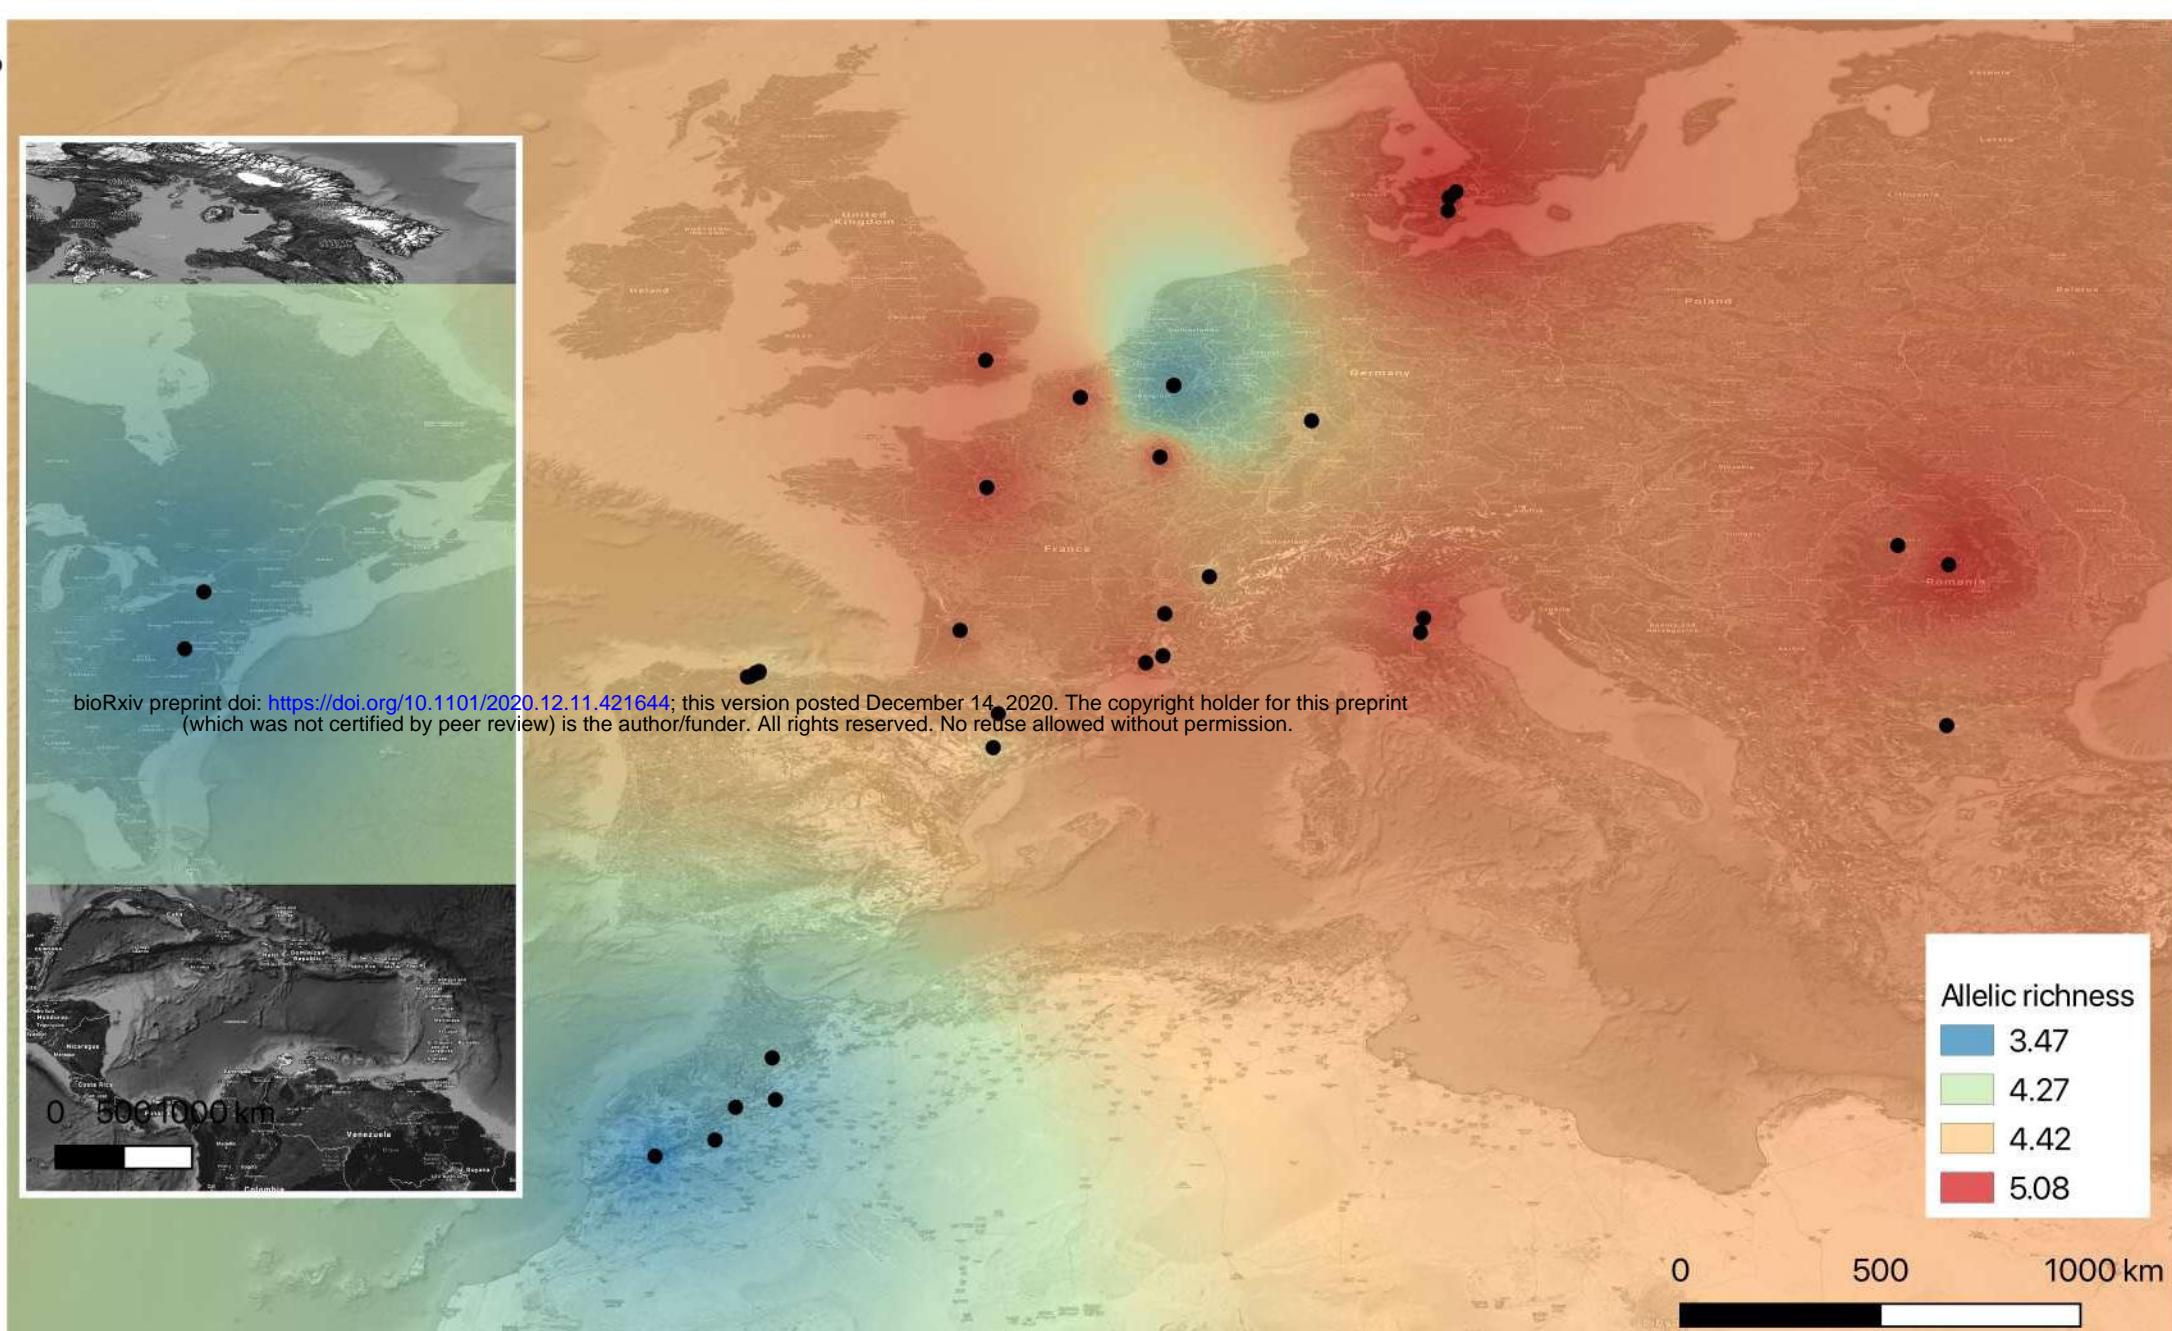

b.

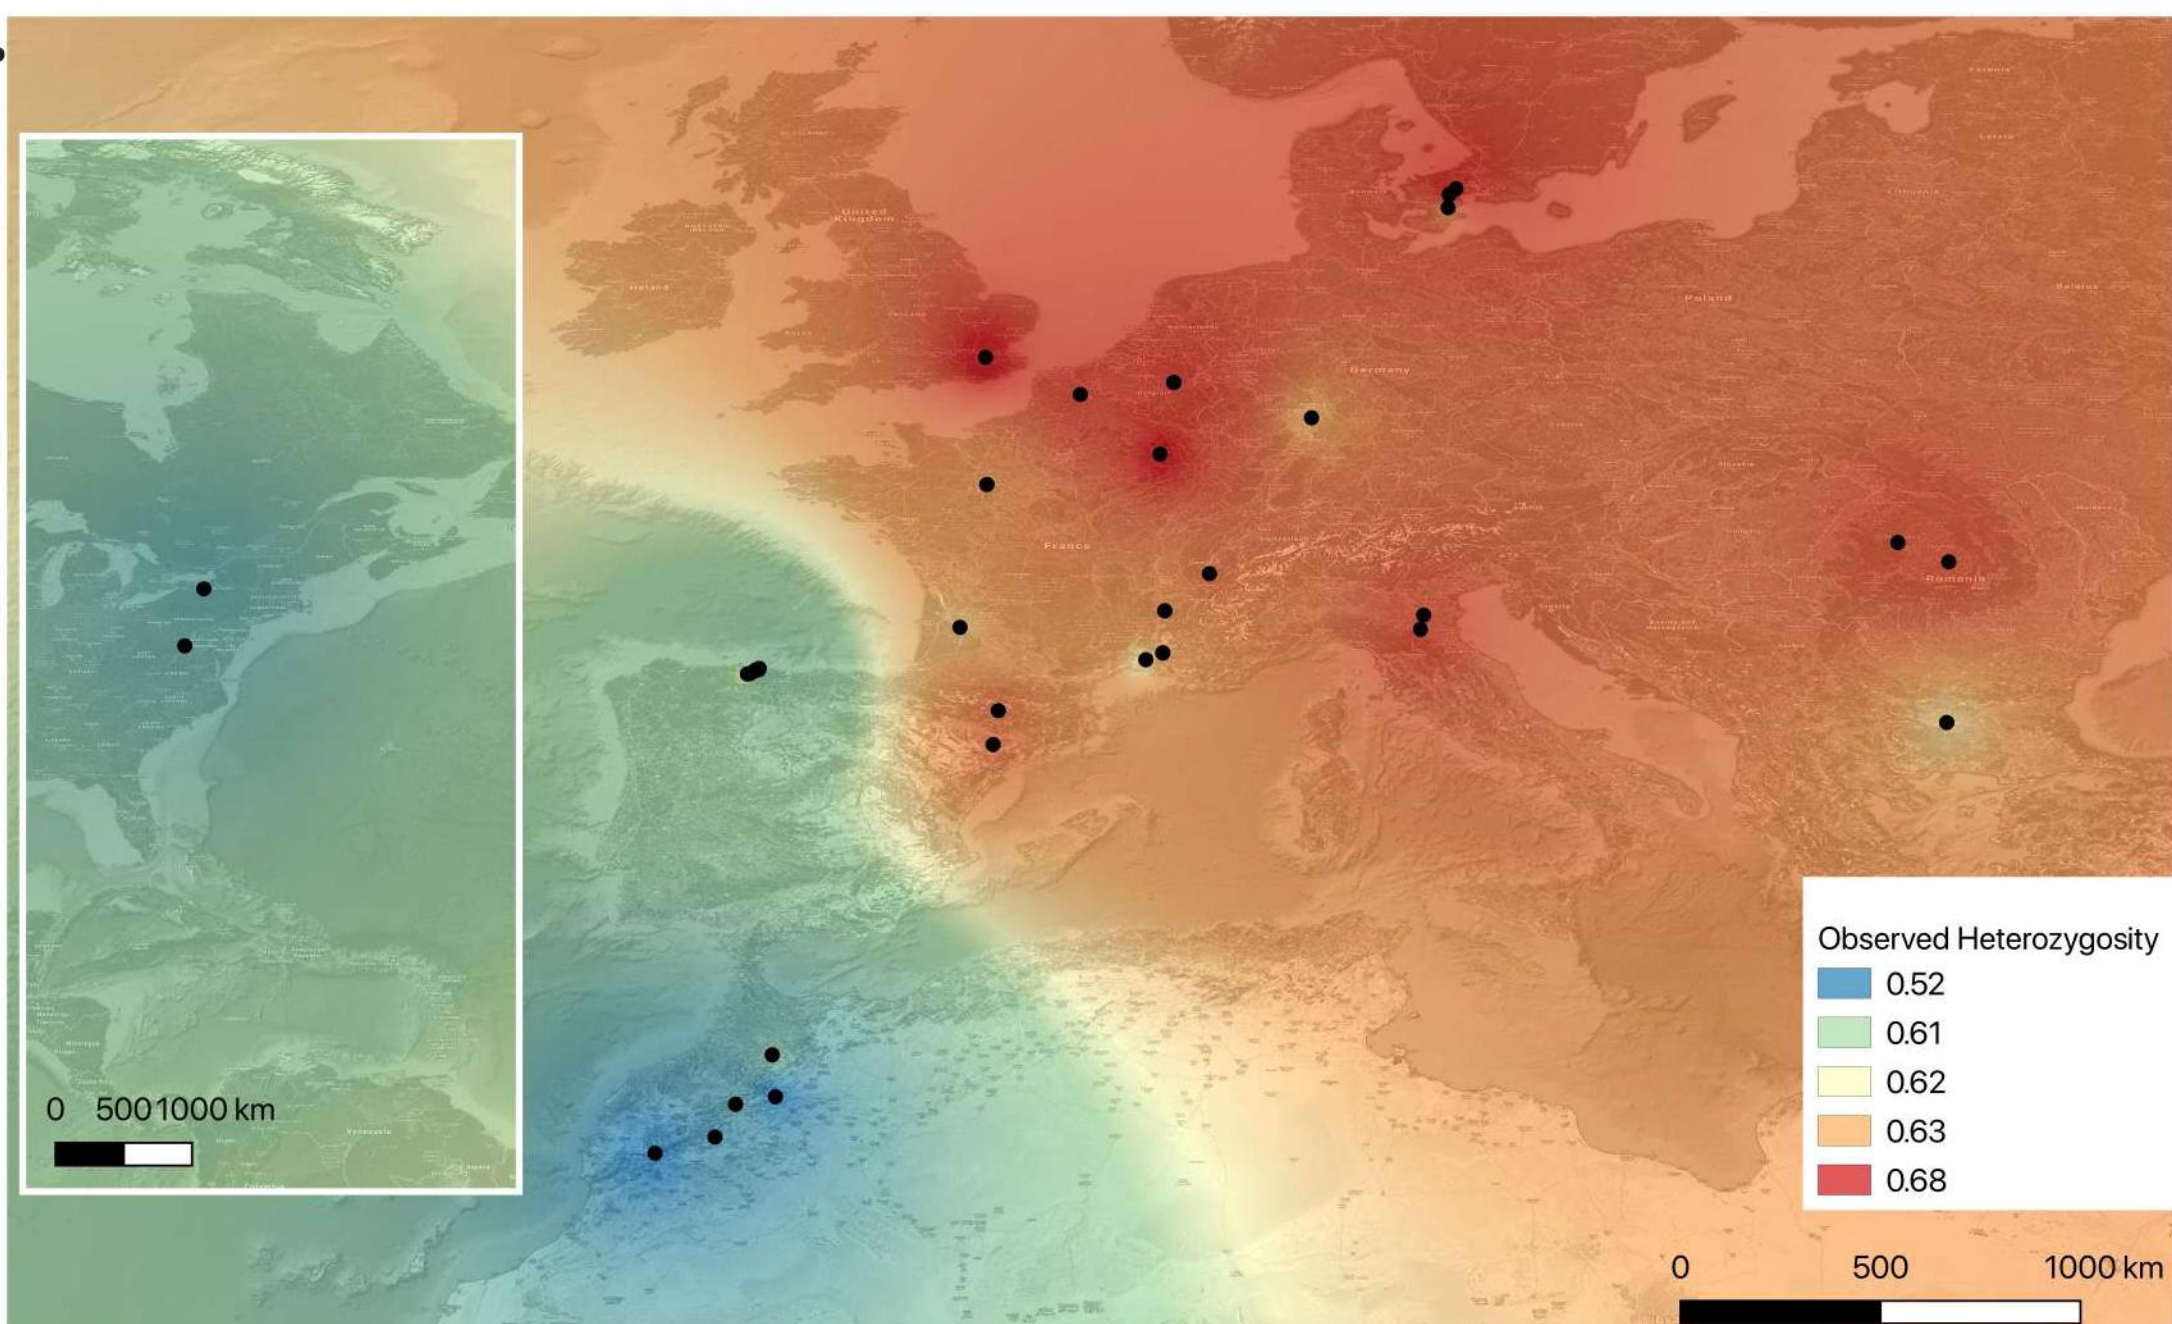

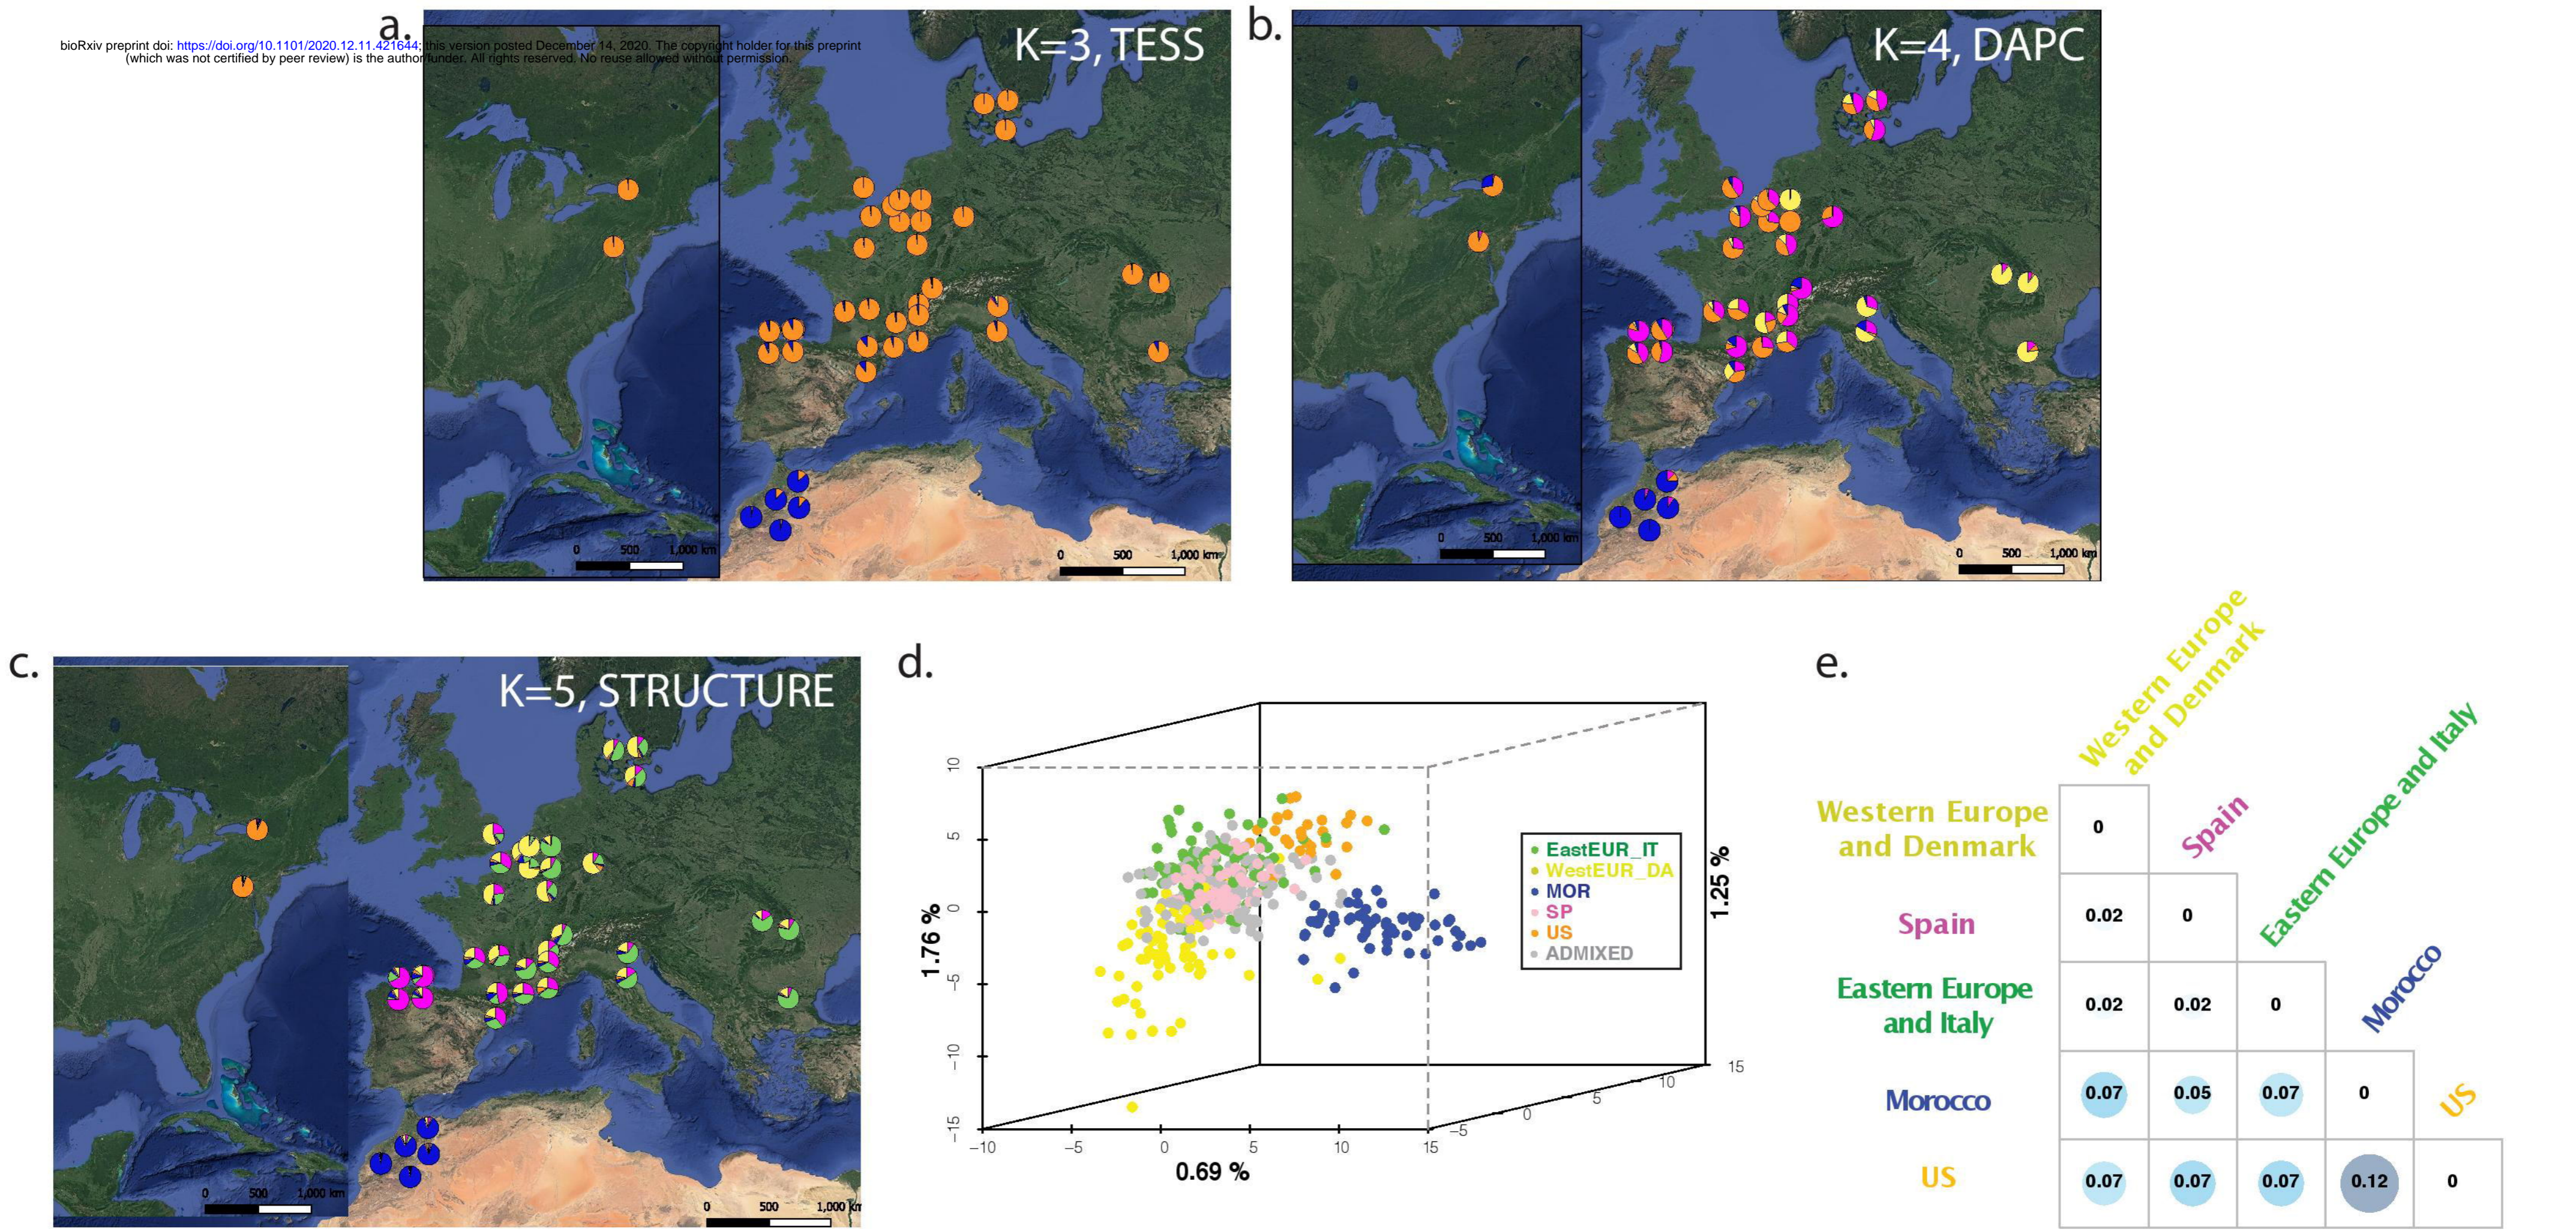

Source: https://www.biorxiv.org/content/10.1101/2020.12.11.421644v1.full.pdf
